# Supplementary material for: The malaria testing and treatment landscape in the southern Lao People’s Democratic Republic (PDR)
Source: Springer Nature journal article supplement (doi:10.1186/s12936-017-1769-0), 2017-04-24
Supplement: MOESM2 [file 12244204]

**ແບບຊອດສອບຖາມຮ້ານຈຳໜ່າຍ (OS)**

ການສຳຫຼວດຮ້ານຈຳໜ່າຍ ACTwatch

ສປປລາວ 2015

**ພາກທີ 1: ການສຳຫຼວດຂໍ້ມູນທັງໝົດ**

*ໃຫ້ສຳພາດທຸກໆຮ້ານ ສຳລັບພາກນີ້*

|                                                                                |                                        |                                                                            |
|--------------------------------------------------------------------------------|----------------------------------------|----------------------------------------------------------------------------|
| ລະຫັດຮ້ານຈຳໜ່າຍ: ນັກສຳພາດ-ເມືອງ-ກຸ່ມບ້ານ-ລະຫັດຮ້ານຈຳໜ່າຍ                       |                                        | [ ]-[ ]-[ ]-[ ]-[ ]-[ ]                                                    |
| C1. ວັນທີຂອງມື້ນີ້ (ວວ/ດດ/ປປປປ)                                                |                                        | [ ]-[ ]-[ ]-[ 2 ]-[ 0 ]-[ 1 ]-[ 5 ]                                        |
| C2. ຊື່ນັກສຳພາດ [ ]                                                            | C2a. ລະຫັດຂອງນັກສຳພາດ [ ]              | [ ]                                                                        |
| C3. ຊື່ເມືອງ [ ]                                                               | C3a. ລະຫັດເມືອງ [ ]                    | [ ]                                                                        |
| C4. ຊື່ກຸ່ມບ້ານ [ ]                                                            | C4a. ລະຫັດກຸ່ມບ້ານ [ ]                 | [ ]                                                                        |
| C5. ຊື່ບ້ານ [ ]                                                                |                                        |                                                                            |
| C6. ຊື່ຮ້ານຄ້າ, ຖ້າບໍ່ມີຊື່, ໃຫ້ບັນທຶກ "ບໍ່ມີຊື່" ຫຼື ໃຫ້ໃສ່ຊື່ "ເຈົ້າຂອງຮ້ານ" | C6a. ລະຫັດຮ້ານຈຳໜ່າຍ                   | [ ]                                                                        |
| C7. ປະເພດຮ້ານຈຳໜ່າຍ                                                            |                                        |                                                                            |
| 01 ໂຮງໝໍແຂວງ                                                                   | 08 ໂຮງໝໍເອກະຊົນ                        | 14 ຮ້ານຂາຍຢາທີ່ໄດ້ບໍ່ຂຶ້ນທະບຽນ                                             |
| 02 ໂຮງໝໍເມືອງ                                                                  | 09 ຫ້ອງກວດພະຍາດເອກະຊົນ (Clinic)        | 15 ຮ້ານນ້ອຍຂາຍເຄື່ອງຍ່ອຍໃນໝູ່ບ້ານ /ຮ້ານຂາຍເຄື່ອງຍ່ອຍ                       |
| 03 ສຸກສາລາ                                                                     | 10 ຮ້ານຂາຍຢາທີ່ໃຫ້ບໍລິການການກວດພະຍາດນຳ | 16 ຄົນຂາຍເຄື່ອງເຄື່ອນທີ່                                                   |
| 04 ອາສາສະໝັກແພດຂັ້ນບ້ານ (ທີ່ໄດ້ຮັບຝຶກອົບຮົມຈາກສູນໄຂ້ຍຸງ)                       | 11 ຮ້ານຂາຍຢາ ຂັ້ນ 1                    | 17 ຫ້ອງວິເຄາະເອກະຊົນ                                                       |
| 05 ໂຮງໝໍທະຫານ/ຕຳຫລວດ                                                           | 12 ຮ້ານຂາຍຢາ ຂັ້ນ 2                    | 18 ຫ້ອງວິເຄາະຂອງອົງການທີ່ບໍ່ຂຶ້ນກັບລັດຖະບານ (NGO)/ໂຄງການໄດ້ຮັບທຶນຈາກສາສະໜາ |
| 07 ຄຶນິກຂອງອົງການທີ່ບໍ່ຂຶ້ນກັບລັດຖະບານ (NGO)/ ຄຶນິກທີ່ໄດ້ຮັບທຶນຈາກສາສະໜາ       | 13 ຮ້ານຂາຍຢາ ຂັ້ນ 3                    | 19 ອາສາສະໝັກແພດບ້ານ (ທີ່ໄດ້ຮັບຝຶກອົບຮົມຈາກອົງການທີ່ບໍ່ຂຶ້ນກັບລັດຖະບານ)     |
|                                                                                |                                        | 96 ອື່ນໆ (ລະບຸ)<br>[ ]                                                     |
| C8. ກຸ່ມບ້ານນີ້ແມ່ນສ່ວນໜຶ່ງຂອງກຸ່ມຕົວຢ່າງຂອງ ບູດສະເຕີ ບໍ່?                     | 1 = ແມ່ນ 0 = ບໍ່ແມ່ນ                   | [ ]                                                                        |

ລະຫັດຮ້ານຈຳໜ່າຍ: [ ]-[ ]-[ ]-[ ]-[ ]

ສະບາຍດີ, ຂ້າພະເຈົ້າຊື່ \_\_\_\_\_, ຂ້າພະເຈົ້າເຮັດວຽກໃນນາມຂອງ ອົງການສາກົນ ບໍລິການປະຊາຊົນ (ພີເອສໄອ). ພວກເຮົາກຳລັງດຳເນີນການສຶກສາກ່ຽວກັບການມີຢາປິ່ນປົວໄຂ້ມາເລເລຍ ແລະ ການໃຫ້ບໍລິການການກວດເພື່ອບົ່ງມະຕິພະຍາດໄຂ້ມາເລເລຍ. ຜົນໄດ້ຮັບຈາກການສຶກສາຄັ້ງນີ້ຈະຖືກນຳໃຊ້ເຂົ້າໃນການປັບປຸງ ການມີຢາປິ່ນປົວໄຂ້ມາເລເລຍ ທີ່ເໝາະສົມຢູ່ປະເທດລາວ. ຂ້າພະເຈົ້າຂໍຖາມຄຳຖາມ ທ່ານເພື່ອເບິ່ງວ່າທ່ານຈະເປັນສ່ວນໜຶ່ງ ໃນການສຳຫຼວດຄັ້ງນີ້ບໍ່.

| ພາກທີ 2: ການຄັດເລືອກ & ເງື່ອນໄຂທີ່ເໝາະສົມ                                                                                                                                                                                                                                                                                               |     |
|-----------------------------------------------------------------------------------------------------------------------------------------------------------------------------------------------------------------------------------------------------------------------------------------------------------------------------------------|-----|
| S1. ມື້ນີ້, ທ່ານມີຢາຊະນິດໃດໜຶ່ງບໍ່?<br>1 = ມີ <b>ໄປຂໍ້ S3</b><br>0 = ບໍ່ມີ                                                                                                                                                                                                                                                              | [ ] |
| S2. ມື້ນີ້, ມີຢາຊະນິດໃດໜຶ່ງບໍ່ທີ່ບໍ່ມີໃນຮ້ານ, ແຕ່ວ່າເຄີຍມີໃນຮ້ານ ໃນໄລຍະ 3 ເດືອນຜ່ານມາ?<br>1 = ມີ <b>ໄປຂໍ້ S4</b><br>0 = ບໍ່ມີ <b>ໄປຂໍ້ S5</b><br>8 = ບໍ່ຮູ້ <b>ໄປຂໍ້ S5</b>                                                                                                                                                             | [ ] |
| S3. ມື້ນີ້, ທ່ານມີຢາປິ່ນປົວໄຂ້ມາເລເລຍບໍ່?<br>1 = ມີ <b>ເອົາເຈ້ຍຂໍ້ມູນຂອງການສຶກສາໃຫ້ ແລະ ຖາມຄວາມຍິນຍອມໃນການເຂົ້າຮ່ວມ. ບັນທຶກເວລາເລີ່ມ ໃນ C9. ໄປຂໍ້ທີ່ ພາກທີ 3: ການກວດສອບຢາປິ່ນປົວໄຂ້ມາເລເລຍ .</b><br>0 = ບໍ່ມີ <b>ກວດກາຄວາມຖືກຕ້ອງດ້ວຍບັດສະແດງ. ໄປຂໍ້ S4</b>                                                                             | [ ] |
| S4. ມື້ນີ້, ມີຢາປິ່ນປົວໄຂ້ມາເລເລຍທີ່ບໍ່ມີໃນຮ້ານບໍ່, ແຕ່ວ່າເຄີຍມີໃນຮ້ານ ໃນໄລຍະ 3 ເດືອນຜ່ານມາ?<br>1 = ມີ <b>ເອົາເຈ້ຍຂໍ້ມູນຂອງການສຶກສາໃຫ້ ແລະ ຖາມຄວາມຍິນຍອມໃນການເຂົ້າຮ່ວມ. ບັນທຶກເວລາເລີ່ມ ໃນ C9. ໄປຂໍ້ທີ່ A17.</b><br>0 = ບໍ່ມີ <b>ກວດກາຄວາມຖືກຕ້ອງດ້ວຍບັດສະແດງ. ໄປຂໍ້ S5</b><br>8 = ບໍ່ຮູ້ <b>ກວດກາຄວາມຖືກຕ້ອງດ້ວຍບັດສະແດງ. ໄປຂໍ້ S5</b> | [ ] |
| S5. ມື້ນີ້, ທ່ານໄດ້ໃຫ້ບໍລິການບົ່ງມະຕິ ຫຼື ໄດ້ຂາຍອຸປະກອນໃນການກວດເພື່ອບົ່ງມະຕິບໍ່?<br>1 = ມີ <b>ໄປຂໍ້ S6</b><br>0 = ບໍ່ມີ <b>ກວດກາຄວາມຖືກຕ້ອງດ້ວຍບັດສະແດງ. ບັນທຶກລາຍລະອຽດໃນ C9 ແລ້ວຕື່ມຂໍ້ມູນໃສ່ ພາກ X: ການຈົບການສຳພາດ</b>                                                                                                                | [ ] |
| S6. ການບໍລິການ ຫຼື ອຸປະກອນກວດເຫຼົ່ານີ້ແມ່ນໃຊ້ສຳລັບກວດຫາກໍລະນີສົງໄສເປັນໄຂ້ມາເລເລຍ ບໍ່?<br>1 = ມີ <b>ເອົາເຈ້ຍຂໍ້ມູນຂອງການສຶກສາໃຫ້ ແລະ ຖາມຄວາມຍິນຍອມໃນການເຂົ້າຮ່ວມ. ບັນທຶກເວລາເລີ່ມ ໃນ C9. ໄປພາກທີ 4: ກວດສອບການບົ່ງມະຕິ</b><br>0 = ບໍ່ມີ <b>ກວດກາຄວາມຖືກຕ້ອງດ້ວຍບັດສະແດງ. ບັນທຶກລາຍລະອຽດໃນ C9 ແລ້ວຕື່ມຂໍ້ມູນໃສ່ ພາກ X: ການຈົບການສຳພາດ</b>  | [ ] |

ກ່ອນການດຳເນີນການສຳພາດ ແບບຄົບຖ້ວນໃຫ້ໝັ້ນໃຈວ່າ ທ່ານໄດ້ໃຫ້ເຈ້ຍຂໍ້ມູນຂອງການສຶກສານີ້ແກ່ຜູ້ຖືກສຳພາດ, ໄດ້ອະທິບາຍການສຶກສາ ແລະ ໄດ້ຂໍຄວາມຍິນຍອມໃນການເຂົ້າຮ່ວມແລ້ວ

C9. ຜົນຂອງການຢ້ຽມຢາມ

| ວັນທີ<br>(ວວ/ດດ/ປປ)                                                                                                                                                                                                                                                                                                                                                                                             | ການຢ້ຽມຢາມຄັ້ງທີ 1                                                                                                                                                                                                                                                                                                                                                                                                                                                                                                                                                                                                                                                                  | ການຢ້ຽມຢາມຄັ້ງທີ 2 | ການຢ້ຽມຢາມຄັ້ງທີ 3 |
|-----------------------------------------------------------------------------------------------------------------------------------------------------------------------------------------------------------------------------------------------------------------------------------------------------------------------------------------------------------------------------------------------------------------|-------------------------------------------------------------------------------------------------------------------------------------------------------------------------------------------------------------------------------------------------------------------------------------------------------------------------------------------------------------------------------------------------------------------------------------------------------------------------------------------------------------------------------------------------------------------------------------------------------------------------------------------------------------------------------------|--------------------|--------------------|
|                                                                                                                                                                                                                                                                                                                                                                                                                 | [ ]-[ ]-[ ]-[1][5]                                                                                                                                                                                                                                                                                                                                                                                                                                                                                                                                                                                                                                                                  | [ ]-[ ]-[ ]-[1][5] | [ ]-[ ]-[ ]-[1][5] |
| ເວລາເລີ່ມ<br>(ບັນທຶກເປັນ 24 ຊົ່ວໂມງ)                                                                                                                                                                                                                                                                                                                                                                            | [ ]:[ ]                                                                                                                                                                                                                                                                                                                                                                                                                                                                                                                                                                                                                                                                             | [ ]:[ ]            | [ ]:[ ]            |
| ເວລາທີ່ສຳເລັດ<br>(ບັນທຶກເປັນ 24 ຊົ່ວໂມງ)                                                                                                                                                                                                                                                                                                                                                                        | [ ]:[ ]                                                                                                                                                                                                                                                                                                                                                                                                                                                                                                                                                                                                                                                                             | [ ]:[ ]            | [ ]:[ ]            |
| ຜົນທີ່ໄດ້                                                                                                                                                                                                                                                                                                                                                                                                       | [ ]                                                                                                                                                                                                                                                                                                                                                                                                                                                                                                                                                                                                                                                                                 | [ ]                | [ ]                |
|                                                                                                                                                                                                                                                                                                                                                                                                                 | 01 = ຮ້ານຈຳໜ່າຍທີ່ເໝາະສົມ ແລະ ໄດ້ສຳເລັດການສຳຫຼວດ <span style="float:right">ໄປຂໍ້ E1</span><br>02 = ຮ້ານຈຳໜ່າຍທີ່ບໍ່ເໝາະສົມ: ບໍ່ເໝາະສົມກັບເງື່ອນໄຂໃດໜຶ່ງໃນພາກຄັດເລືອກ <span style="float:right">ໄປຂໍ້ E1</span><br>03 = ໄດ້ຢຸດການສຳພາດເພາະຖືກລົບກວນ/ຂັດຈັງຫວະ <span style="float:right">ໄປຂໍ້ C11</span><br>04 = ຜູ້ຖືກສຳພາດບໍ່ຢູ່/ບໍ່ສະດວກໃນເວລານີ້ <span style="float:right">ໄປຂໍ້ C11</span><br>05 = ຮ້ານຈຳໜ່າຍບໍ່ເປີດໃນເວລານັ້ນ <span style="float:right">ໄປຂໍ້ C11</span><br>06 = ຮ້ານຈຳໜ່າຍປິດຖາວອນ <span style="float:right">ໄປຂໍ້ E1</span><br>96 = ອື່ນໆ (ລະບຸ)[ ] <span style="float:right"></span><br>97 = ປະຕິເສດການເຂົ້າຮ່ວມ <span style="float:right">ໄປຂໍ້ C10</span> |                    |                    |
| C10. ຖ້າຜູ້ໃຫ້ບໍລິການປະຕິເສດການສຳພາດ, ຍ້ອນຫຍັງ?                                                                                                                                                                                                                                                                                                                                                                 |                                                                                                                                                                                                                                                                                                                                                                                                                                                                                                                                                                                                                                                                                     |                    |                    |
| 1 = ລູກຄ້າຫຼາຍ ຖາມຜູ້ຖືກສຳພາດສຳລັບເວລາທີ່ເຂົາເຈົ້າສະດວກ ແລະ ບັນທຶກໄວ້ໃນ <span style="float:right">C11</span><br>2 = ຄິດວ່າມັນແມ່ນການກວດສອບ / ກັງວົນກ່ຽວກັບໃບອະນຸຍາດ <span style="float:right">ໄປຂໍ້ E1</span><br>3 = ບໍ່ມີຄວາມສົນໃຈ <span style="float:right">ໄປຂໍ້ E1</span><br>6 = ອື່ນໆ (ລະບຸ): [ ] <span style="float:right"></span><br>7 = ປະຕິເສດທີ່ຈະໃຫ້ເຫດຜົນ <span style="float:right">ໄປຂໍ້ E1</span> |                                                                                                                                                                                                                                                                                                                                                                                                                                                                                                                                                                                                                                                                                     |                    | [ ]                |
| C11. ນຳໃຊ້ບ່ອນວ່າງນີ້ໃນການບັນທຶກລາຍລະອຽດເວລາກັບໄປສຳພາດຄືນ. ຖ້າວ່າບໍ່ສາມາດສຳເລັດການສຳພາດໄດ້ໃນເວລາອື່ນ, ໄປຂໍ້ E1                                                                                                                                                                                                                                                                                                  |                                                                                                                                                                                                                                                                                                                                                                                                                                                                                                                                                                                                                                                                                     |                    |                    |

|                                                                                                                                      |                                                                                                               |
|--------------------------------------------------------------------------------------------------------------------------------------|---------------------------------------------------------------------------------------------------------------|
| <b>ພາກ X: ການຈົບການສຳພາດ</b>                                                                                                         |                                                                                                               |
| E1. ຊື່ຜູ້ຖືກສຳພາດ:<br>[ ]<br>5 = ບໍ່ມີຂໍ້ມູນ, ບໍ່ມີຜູ້ໃຫ້ສຳພາດ; 7 = ປະຕິເສດ                                                         |                                                                                                               |
| E2. ທີ່ຢູ່ ຫຼື ຂໍ້ມູນທີ່ຕັ້ງຂອງຮ້ານຈຳໜ່າຍ (ບໍ່ແມ່ນຕູ້ ປນ)<br>(ໃຫ້ການອະທິບາຍທີ່ລະອຽດ ທີ່ຈະຊ່ວຍໃຫ້ທົ່ວໜ້າທຶນ ໃນການຊອກຫາ<br>ຮ້ານຈຳໜ່າຍ) | E3. ເບີໂທລະສັບ (ເບີໂທຫລັກ)<br>_____<br>9999999995 = ບໍ່ມີຜູ້ໃຫ້ສຳພາດ/ ບໍ່ມີເບີໂທລະສັບ<br>9999999997 = ປະຕິເສດ |
| E4. ເສັ້ນຂະໜານ:<br>[N] - [ ] . [ ] [ ] [ ] [ ] [ ] [ ]                                                                               | E5. ເສັ້ນແວງ:<br>[E] - [ ] [ ] [ ] [ ] [ ] [ ] [ ]                                                            |
| E7. ການສັງເກດເພີ່ມເຕີມໂດຍນັກສຳພາດ (ຖ້າມີ)                                                                                            |                                                                                                               |

ຂອບໃຈຜູ້ໃຫ້ບໍລິການ ແລະ ຈົບການສຳພາດ

(Blank page)

**ພາກທີ 3: ກວດສອບຢາປິ່ນປົວພະຍາດໄຂ້ມາເລເລຍ**

**A0. ອ່ານໃຫ້ຜູ້ໃຫ້ບໍລິການຟັງ:**

ພວກເຮົາຂໍເບິ່ງລາຍການ ທີ່ທ່ານມີຢູ່ໃນຮ້ານໃນປະຈຸບັນໄດ້ບໍ່? ທ່ານມີຢາຕາມລາຍຊື່ຢາດັ່ງລຸ່ມນີ້ບໍ່?

**ສະແດງລາຍການທັງໝົດໃຊ້ບັດສະແດງລາຍການຢາປິ່ນປົວໄຂ້ມາເລເລຍ ; ບໍ່ຕ້ອງບັນທຶກຄ່າຕອບ**

1. Artemether– Lumefantrim (Coartem, Combiart)
2. Chloroquine Phosphate (Cloroquin Phosphat, Malacin, Maraquine, Nitaquin)
3. Cholorquine (Chloroquine, Nivaquine)
4. Artesunate (Artesunate, Artesun, Artesunaf)

**ຖ້າວ່າຮ້ານຈຳໜ່າຍບໍ່ມີຢາປິ່ນປົວພະຍາດໄຂ້ມາເລເລຍໃນຮ້ານໃຫ້ ກວດເບິ່ງພາກຄັດເລືອກອີກເທື່ອໜຶ່ງແລ້ວໄປສູ່ຄຳຖາມຂໍ້ A17.**

- ດຳເນີນການກວດສອບຢາປິ່ນປົວພະຍາດໄຂ້ມາເລເລຍ. ແບບຟອມໃນການກວດສອບຢາປິ່ນປົວພະຍາດໄຂ້ມາເລເລຍ ຕ່າງໆຈະຖືກນຳໃຊ້ໃນການບັນທຶກຂໍ້ມູນຢາປິ່ນປົວພະຍາດໄຂ້ມາເລເລຍ ອີງຕາມຮູບແບບຂອງຢາ .
- ແບບຟອມໃນການປິ່ນປົວພະຍາດໄຂ້ມາເລເລຍ ແບບຟອມກວດສອບຢາປິ່ນປົວໄຂ້ມາເລເລຍ ຊຸດອື່ນຈະຖືກນຳໃຊ້ເພື່ອມາບັນທຶກຂໍ້ມູນມາປິ່ນປົວໄຂ້ມາເລເລຍ ໂດຍອີງຕາມຮູບແບບຂອງຢາ: (ຮູບແບບຢາເມັດ ແລະ ຮູບແບບບໍ່ແມ່ນຢາເມັດ)
- ແຍກຢາປິ່ນປົວພະຍາດໄຂ້ມາເລເລຍ ເປັນສອງຈຳພວກ:
  - ຈຳພວກທຳອິດແມ່ນປະກອບມີຢາປິ່ນປົວພະຍາດໄຂ້ມາເລເລຍ ທັງໝົດທີ່ຢູ່ໃນຮູບແບບເມັດ, ຢາຍັດ, ຫຼື ຢາຝຸ່ນເປັນຊອງ. ນຳໃຊ້ແບບຟອມສຳລັບກວດສອບຢາເມັດ, ຢາຍັດ ແລະ ຢາເປັນຝຸ່ນຊອງໃນການບັນທຶກຢາເຫຼົ່ານີ້.
  - ຈຳພວກທີສອງແມ່ນປະກອບມີຢາປິ່ນປົວພະຍາດໄຂ້ມາເລເລຍ ທັງໝົດທີ່ຢູ່ໃນຮູບແບບອື່ນໆທີ່ບໍ່ແມ່ນຮູບແບບເມັດ, ຢາຍັດ, ຫຼື ແບບເປັນຝຸ່ນຊອງ .. ນຳໃຊ້ແບບຟອມກວດສອບຢາທີ່ບໍ່ແມ່ນຢາເມັດໃນການບັນທຶກຢາເຫຼົ່ານີ້.
- ຖ້າວ່າຫາກຕ້ອງໃຊ້ເຈ້ຍ ຫຼື ແບບຟອມກວດສອບເພີ່ມເຕີມອີກ, ໃຫ້ເອົາເຈ້ຍ ຫຼື ແບບຟອມກວດສອບເຫຼົ່ານັ້ນ ມາໜັບຕິດຂັດໃສ່ທາງດ້ານຫຼັງຂອງໂຕທີ່ຕໍ່.
- ທຸກໆໜ້າເຈ້ຍຈະຕ້ອງລຽງເລກລຳດັບ ກ່ອນທີ່ຈະຍ້າຍໄປຮ້ານໃໝ່.
- ໝາຍເລກຢາແຕ່ລະຕົວໂດຍການກຳນົດໝາຍເລກຜະລິດຕະພັນ (ເລີ້ມຈາກ 1 ສຳລັບຢາທີ່ເປັນ ຢາເມັດ, ຢາຍັດ, ຢາຝຸ່ນເປັນຊອງ ແລະ ເລີ້ມຈາກ 1 ອີກສຳລັບຢາທີ່ ບໍ່ແມ່ນເມັດ)
- ໝາຍເລກເຈ້ຍກວດສອບແຕ່ລະໂບທີ່ໄດ້ນຳໃຊ້ລົງ ໃນບ່ອນວ່າງດ້ານລຸ່ມຂອງໜ້າເຈ້ຍ,

**ຄຳອະທິບາຍເພີ່ມເຕີມສຳລັບລະຫັດໜ່ວຍງານຍ່ອຍ**

**ໃນບັນດາຮ້ານຈຳໜ່າຍທັງໝົດ, ໃຫ້ຕື່ມລະຫັດ ໜ່ວຍງານຍ່ອຍໃສ່ (ພ້ອມທັງໝາຍເລກຜະລິດຕະພັນ) ສຳລັບແຕ່ລະຢາທີ່ໄດ້ຖືກກວດສອບ. ລະຫັດເຫຼົ່ານີ້ແມ່ນມີລາຍການດັ່ງລຸ່ມນີ້**

| ລະຫັດໜ່ວຍງານຍ່ອຍ |                                                                                                                                                                            |
|------------------|----------------------------------------------------------------------------------------------------------------------------------------------------------------------------|
| X                | ບັນດາຮ້ານຈຳໜ່າຍຕ່າງໆທີ່ມີ ຈຸດຈ່າຍ/ແຈກຢາຍຢາ ສຳລັບຢາປິ່ນປົວ/ການບົ່ງມະຕິ ຈຸດດຽວເທົ່ານັ້ນ.                                                                                     |
| A                | ພະແນກກວດເຂດນອກ / ບ່ອນຈ່າຍຢາ/ ຮ້ານຂາຍຢາຫຼັກ ( ທີ່ຄົນເຈັບທັງໝົດມາໃຊ້ບໍລິການ).                                                                                                |
| B                | ພະແນກກວດເຂດນອກສຳລັບຜູ້ໃຫຍ່/ບ່ອນຈ່າຍຢາສຳລັບຜູ້ໃຫຍ່/ຄລິນິກຜູ້ໃຫຍ່                                                                                                            |
| C                | ພະແນກກວດເຂດນອກສຳລັບເດັກ/ບ່ອນຈ່າຍຢາສຳລັບເດັກ/ຄລິນິກເດັກ                                                                                                                     |
| D                | ຝາກທ້ອງ / ຄລິນິກສຳລັບແມ່ / ສຸຂະພາບແມ່ ແລະ ເດັກ                                                                                                                             |
| E                | ຄລິນິກບໍລິການປິ່ນປົວພະຍາດເອດສ໌ (ART) / ຄລິນິກ HIV / ໂລກເອດສ໌ AIDS                                                                                                          |
| F                | ພະແນກ ພະຍາດຕິດຕໍ່                                                                                                                                                          |
| G                | ພະແນກສຸກເສີນ                                                                                                                                                               |
| H                | ພະແນກຈ່າຍຢາທີ່ເປັນຂອງເອກະຊົນທີ່ຕັ້ງຢູ່ໃນສະຖານທີ່ບໍລິການສາທາລະນະສຸກຂອງລັດ                                                                                                   |
| I                | ໜ່ວຍງານວິເຄາະ (ສຳລັບການກວດບົ່ງມະຕິແບບວ່ອງໄວ)                                                                                                                               |
| Z                | ອື່ນໆ (ລະບຸລະອຽດກ່ຽວກັບປະເພດ ໃນບ່ອນວ່າງສຳລັບທ້ອງຄຳເຫັນຢູ່ໃນເຈ້ຍກວດສອບເຈ້ຍກວດສອບ ຢາເມັດ, ຢາຍັດ, ຢາຝຸ່ນເປັນຊອງ (TSG) ຂໍ້ 15 ຫຼື ເຈ້ຍກວດສອບຢາທີ່ບໍ່ແມ່ນຊະນິດເມັດ (NT) ຂໍ້ 15) |

(Black page)

ເຈ້ຍກວດສອບ ຢາເມັດ, ຢາຍັດ, ຢາຝຸ່ນເປັນຊອງ (TSG):

ລະຫັດຮ້ານຍ່ອຍ: [ ]-[ ]-[ ]-[ ]-[ ]-[ ]

|                                                                            |                           |                                                                                                                                                             |                                                                                                                                 |                                                                                                    |                                                                                                                                                                                                                                                                                                                                                                                                                                                                                    |                                                                                                                                          |
|----------------------------------------------------------------------------|---------------------------|-------------------------------------------------------------------------------------------------------------------------------------------------------------|---------------------------------------------------------------------------------------------------------------------------------|----------------------------------------------------------------------------------------------------|------------------------------------------------------------------------------------------------------------------------------------------------------------------------------------------------------------------------------------------------------------------------------------------------------------------------------------------------------------------------------------------------------------------------------------------------------------------------------------|------------------------------------------------------------------------------------------------------------------------------------------|
| ລະຫັດໜ່ວຍ<br>ງານຍ່ອຍ<br><br>[ ]<br><br>ໝາຍເລກ<br>ຜະລິດຕະ<br>ພັນ<br><br>[ ] | [ ]<br><br>[ ]<br><br>[ ] | 1. ຊື່ຕົວຢາ                                                                                                                                                 | 2. ຄວາມແຮງ                                                                                                                      | 2a. ມີເປັນຄ່າຄວາມແຮງພື້ນຖານບໍ່?                                                                    | 3. ຮູບແບບຢາ/ລັກສະນະ<br>ຢາ                                                                                                                                                                                                                                                                                                                                                                                                                                                          | 4. ຊື່ການຄ້າ/ຊື່ຍີ່ຫໍ້<br>(ລວມທັງຂໍ້ມູນ ນໍ້າໜັກ ແລະ ອາຍຸ)                                                                                |
|                                                                            |                           |                                                                                                                                                             | [ ]-[ ]-[ ]-[ ]mg                                                                                                               | <input type="checkbox"/> 1 = ແມ່ນ                                                                  | 1 = ຢາເມັດ                                                                                                                                                                                                                                                                                                                                                                                                                                                                         |                                                                                                                                          |
|                                                                            |                           |                                                                                                                                                             | [ ]-[ ]-[ ]-[ ]mg                                                                                                               | <input type="checkbox"/> 0 = ບໍ່ແມ່ນ                                                               | 2 = ຢາຍັດ                                                                                                                                                                                                                                                                                                                                                                                                                                                                          |                                                                                                                                          |
|                                                                            |                           |                                                                                                                                                             | [ ]-[ ]-[ ]-[ ]mg                                                                                                               | <input type="checkbox"/> 8 = ບໍ່ຮູ້                                                                | 3 = ຢາຝຸ່ນເປັນຊອງ                                                                                                                                                                                                                                                                                                                                                                                                                                                                  |                                                                                                                                          |
|                                                                            |                           |                                                                                                                                                             |                                                                                                                                 | ຖ້າບໍ່ແມ່ນ, ໃຫ້ລະບຸສານເຄມີປະສົມ<br>[ ]                                                             | <input type="checkbox"/>                                                                                                                                                                                                                                                                                                                                                                                                                                                           |                                                                                                                                          |
| 5. ຜູ້ຜະລິດ                                                                | 6. ປະເທດທີ່<br>ຜະລິດ      | 7. ຂະໜາດຂອງຫໍ່<br>(Package size)<br><br>ມີຈຳນວນທັງໝົດ<br>[ ]<br><br>ເມັດ/ຢາຍັດ/ຢາຝຸ່ນເປັນ<br>ຊອງ ຢູ່ໃນແຕ່ລະ:<br><br>1 = ຫໍ່/ແຜງ<br>2 = ໂຖ/ກະບ່ອງ<br><br>[ ] | 8. ເປັນຕົວຢາ<br>ທີ່ມີສ່ວນ<br>ປະສົມຫຼາຍ<br>ຕົວຢາຢູ່ໃນ<br>ອັນດຽວ<br>(FDC)<br><br>1 = ແມ່ນ<br>0 = ບໍ່ແມ່ນ<br>8 = ບໍ່ຮູ້<br><br>[ ] | 9. ຜະລິດຕະ<br>ພັນມີເຄື່ອງໝາຍ<br>ໄປໄມ້ສີຂຽວບໍ່?<br><br>1 = ມີ<br>0 = ບໍ່ມີ<br>8 = ບໍ່ຮູ້<br><br>[ ] | 10. ຈຳນວນທີ່ໄດ້ຂາຍ/ແຈກຢາຍໃຫ້ກັບລູກຄ້າຍ່ອຍທັງໝົດໃນ 7<br>ມື້ທີ່ຜ່ານມາ (ກໍລະນີ ບັນທຶກ ຈຳນວນທີ່ / ກະບ່ອງ ແມ່ນຕ້ອງ<br>ບັນທຶກ ຕາມຫົວໜ່ວຍທີ່ໄດ້ລະບຸໄວ້ໃນຄຳຖາມ ຂໍ້ 7 ຫຼື ສາມາດ<br>ບັນທຶກ ຈຳນວນທັງໝົດຂອງຢາເມັດ / ຢາຍັດ / ຢາຝຸ່ນເປັນຊອງທີ່<br>ໄດ້ຂາຍ)<br><br>ຮ້ານຈຳໜ່າຍແຫ່ງນີ້ໄດ້ຂາຍ [ ] ຫໍ່/ແຜງ ຫຼື ໂຖ/<br>ກະບ່ອງ<br>ໃນ 7 ມື້ຜ່ານມາ<br><br>ຫຼື<br><br>ຮ້ານຈຳໜ່າຍແຫ່ງນີ້ໄດ້ຂາຍ [ ] ຢາເມັດ/ຢາຍັດ ຫຼື<br>ທີ່ຢາຝຸ່ນເປັນຊອງ ໃນ 7 ມື້ຜ່ານມາ<br><br>ບໍ່ມີຂໍ້ມູນ = 995; ປະຕິເສດ = 997; ບໍ່ຮູ້ = 998 | 11. ເຄີຍມີຢາບໍ່ມີ<br>ໃນຮ້ານ ໃນຊ່ວງ<br>ເວລາໃດໜຶ່ງໃນ<br>ໄລຍະ 3 ເດືອນ<br>ຜ່ານມາບໍ່?<br><br>1 = ແມ່ນ<br>0 = ບໍ່ແມ່ນ<br>8 = ບໍ່ຮູ້<br><br>[ ] |
|                                                                            | [ ]                       |                                                                                                                                                             |                                                                                                                                 |                                                                                                    |                                                                                                                                                                                                                                                                                                                                                                                                                                                                                    |                                                                                                                                          |

ເຈ້ຍກວດສອບ ຢາເມັດ, ຢາຍັດ, ຢາຝຸ່ນເປັນຊອງ (TSG):

ລະຫັດຮ້ານຍ່ອຍ: [ ]-[ ]-[ ]-[ ]-[ ]-[ ]-[ ]-[ ]-[ ]-[ ]-[ ]

|                                                                                                                                                                                            |                                                                                                                                                                                                                                 |                                                                                                                                                                                                                                                                                                                                                                                                                                                                                                                                                                                                                                                                                                                     |             |   |        |   |                   |   |         |   |                                    |   |                                |   |                               |   |                                        |   |        |   |       |   |                                                                                                                                                                                                                                                                                                                                                                                                                                                                                                                                                                                                                                                                                                                                                                                                                                                                                                                                                                                                          |          |                          |             |                          |          |                          |             |                          |          |                          |             |                          |
|--------------------------------------------------------------------------------------------------------------------------------------------------------------------------------------------|---------------------------------------------------------------------------------------------------------------------------------------------------------------------------------------------------------------------------------|---------------------------------------------------------------------------------------------------------------------------------------------------------------------------------------------------------------------------------------------------------------------------------------------------------------------------------------------------------------------------------------------------------------------------------------------------------------------------------------------------------------------------------------------------------------------------------------------------------------------------------------------------------------------------------------------------------------------|-------------|---|--------|---|-------------------|---|---------|---|------------------------------------|---|--------------------------------|---|-------------------------------|---|----------------------------------------|---|--------|---|-------|---|----------------------------------------------------------------------------------------------------------------------------------------------------------------------------------------------------------------------------------------------------------------------------------------------------------------------------------------------------------------------------------------------------------------------------------------------------------------------------------------------------------------------------------------------------------------------------------------------------------------------------------------------------------------------------------------------------------------------------------------------------------------------------------------------------------------------------------------------------------------------------------------------------------------------------------------------------------------------------------------------------------|----------|--------------------------|-------------|--------------------------|----------|--------------------------|-------------|--------------------------|----------|--------------------------|-------------|--------------------------|
| <p>12. ລາຄາຂາຍຍ່ອຍ</p> <p>ຈຳນວນ<br/>[ ] [ ] [ ] [ ]</p> <p>ຢາເມັດ/ຢາຍັດ ຫຼື ຢາຝຸ່ນເປັນຊອງ</p> <p>ລູກຄ້າແຕ່ລະຄົນຕ້ອງຈ່າຍ<br/>[ ] [ ] [ ] [ ] [ ] [ ] [ ] [ ] [ ] [ ] [ ] [ ]</p> <p>ກີບ</p> | <p>13. ລາຄາຊື້ຍົກ (ຄັ້ງລ້າສຸດ)</p> <p>ຈຳນວນ<br/>[ ] [ ] [ ] [ ] [ ] [ ] [ ] [ ] [ ] [ ] [ ] [ ]</p> <p>ຢາເມັດ/ຢາຍັດ ຫຼື ຢາຝຸ່ນເປັນຊອງ</p> <p>ແມ່ນຊື້ມາໃນລາຄາ<br/>[ ] [ ] [ ] [ ] [ ] [ ] [ ] [ ] [ ] [ ] [ ] [ ]</p> <p>ກີບ</p> | <p>14. ເປັນຫຍັງທ່ານຈຶ່ງມີຢານີ້ [ສະແດງ ຜະລິດຕະພັນ]?<br/><i>ບໍ່ຕ້ອງອ່ານລາຍການ ຂີດວົງອ້ອມເອົາທຸກຄຳຕອບທີ່ຜູ້ຕອບຕອບ</i></p> <table border="0"> <tr><td>ໄດ້ຮັບຢາລ້າ</td><td>A</td></tr> <tr><td>ມີກຳໄລ</td><td>B</td></tr> <tr><td>ຖືກແນະນຳໂດຍພາກລັດ</td><td>C</td></tr> <tr><td>ລາຄາຖືກ</td><td>D</td></tr> <tr><td>ຄວາມຕ້ອງການ ຫຼື ຄວາມນິຍົມຂອງລູກຄ້າ</td><td>E</td></tr> <tr><td>ຊື່ສຽງທາງບວກຂອງເຄື່ອງໝາຍສິນຄ້າ</td><td>F</td></tr> <tr><td>ໄດ້ຮັບການສັ່ງໂດຍທ່ານໝໍເລື້ອຍໆ</td><td>G</td></tr> <tr><td>ໄດ້ຮັບຜົນດີທີ່ສຸດສຳລັບການປົວໄຂ້ມາເລເລຍ</td><td>H</td></tr> <tr><td>ບໍ່ຮູ້</td><td>X</td></tr> <tr><td>ອື່ນໆ</td><td>Z</td></tr> </table> <p>ອະທິບາຍລະອຽດ<br/>[ ] [ ] [ ] [ ] [ ] [ ] [ ] [ ] [ ] [ ] [ ] [ ]</p> | ໄດ້ຮັບຢາລ້າ | A | ມີກຳໄລ | B | ຖືກແນະນຳໂດຍພາກລັດ | C | ລາຄາຖືກ | D | ຄວາມຕ້ອງການ ຫຼື ຄວາມນິຍົມຂອງລູກຄ້າ | E | ຊື່ສຽງທາງບວກຂອງເຄື່ອງໝາຍສິນຄ້າ | F | ໄດ້ຮັບການສັ່ງໂດຍທ່ານໝໍເລື້ອຍໆ | G | ໄດ້ຮັບຜົນດີທີ່ສຸດສຳລັບການປົວໄຂ້ມາເລເລຍ | H | ບໍ່ຮູ້ | X | ອື່ນໆ | Z | <p>15. ຄຳເຫັນອື່ນໆ</p> <p>16a. ຢານີ້ແມ່ນຢາເມັດບໍ່?<br/> <table border="1"> <tr><td>1 = ແມ່ນ</td><td><input type="checkbox"/></td></tr> <tr><td>0 = ບໍ່ແມ່ນ</td><td><input type="checkbox"/></td></tr> </table> <i>ຖ້າບໍ່ແມ່ນ, ໃຫ້ໄປຕີທີ່ແບບຟອມຕໍ່ໄປ.</i> </p> <p>16b. ຢາໂຕນີ້ມີສານອອກລິດພຽງຕົວດຽວບໍ່?<br/> <table border="1"> <tr><td>1 = ແມ່ນ</td><td><input type="checkbox"/></td></tr> <tr><td>0 = ບໍ່ແມ່ນ</td><td><input type="checkbox"/></td></tr> </table> <i>ຖ້າບໍ່ແມ່ນ, ໃຫ້ໄປຕີທີ່ແບບຟອມຕໍ່ໄປ.</i> </p> <p>16c. ສານອອກລິດດັ່ງກ່າວແມ່ນໜຶ່ງໃນສານດັ່ງຕໍ່ໄປນີ້ບໍ່?<br/> ອາເຕເມເທີ (ARTEMETHER)<br/> ອາເຕຊູເນີ (ARTESUNATE)<br/> ດີຮາຍໂດອາເຕມີຊີນິນ (DIHYDROARTEMISININ)</p> <table border="1"> <tr><td>1 = ແມ່ນ</td><td><input type="checkbox"/></td></tr> <tr><td>0 = ບໍ່ແມ່ນ</td><td><input type="checkbox"/></td></tr> </table> <p><i>ຖ້າວ່າແມ່ນ, ໃຫ້ຕື່ມພາກ ຢາກິນປິ່ນປົວໄຂ້ມາເລເລຍ ຊະນິດດຽວອາເຕມີຊີນິນ (Oral AMT) ຫຼັງຈາກທີ່ພາກ "ຢາປິ່ນປົວພະຍາດໄຂ້ມາເລເລຍ ທີ່ຂາດສາງ" ໄດ້ຖືກ ຕື່ມຄົບແລ້ວ</i></p> | 1 = ແມ່ນ | <input type="checkbox"/> | 0 = ບໍ່ແມ່ນ | <input type="checkbox"/> | 1 = ແມ່ນ | <input type="checkbox"/> | 0 = ບໍ່ແມ່ນ | <input type="checkbox"/> | 1 = ແມ່ນ | <input type="checkbox"/> | 0 = ບໍ່ແມ່ນ | <input type="checkbox"/> |
| ໄດ້ຮັບຢາລ້າ                                                                                                                                                                                | A                                                                                                                                                                                                                               |                                                                                                                                                                                                                                                                                                                                                                                                                                                                                                                                                                                                                                                                                                                     |             |   |        |   |                   |   |         |   |                                    |   |                                |   |                               |   |                                        |   |        |   |       |   |                                                                                                                                                                                                                                                                                                                                                                                                                                                                                                                                                                                                                                                                                                                                                                                                                                                                                                                                                                                                          |          |                          |             |                          |          |                          |             |                          |          |                          |             |                          |
| ມີກຳໄລ                                                                                                                                                                                     | B                                                                                                                                                                                                                               |                                                                                                                                                                                                                                                                                                                                                                                                                                                                                                                                                                                                                                                                                                                     |             |   |        |   |                   |   |         |   |                                    |   |                                |   |                               |   |                                        |   |        |   |       |   |                                                                                                                                                                                                                                                                                                                                                                                                                                                                                                                                                                                                                                                                                                                                                                                                                                                                                                                                                                                                          |          |                          |             |                          |          |                          |             |                          |          |                          |             |                          |
| ຖືກແນະນຳໂດຍພາກລັດ                                                                                                                                                                          | C                                                                                                                                                                                                                               |                                                                                                                                                                                                                                                                                                                                                                                                                                                                                                                                                                                                                                                                                                                     |             |   |        |   |                   |   |         |   |                                    |   |                                |   |                               |   |                                        |   |        |   |       |   |                                                                                                                                                                                                                                                                                                                                                                                                                                                                                                                                                                                                                                                                                                                                                                                                                                                                                                                                                                                                          |          |                          |             |                          |          |                          |             |                          |          |                          |             |                          |
| ລາຄາຖືກ                                                                                                                                                                                    | D                                                                                                                                                                                                                               |                                                                                                                                                                                                                                                                                                                                                                                                                                                                                                                                                                                                                                                                                                                     |             |   |        |   |                   |   |         |   |                                    |   |                                |   |                               |   |                                        |   |        |   |       |   |                                                                                                                                                                                                                                                                                                                                                                                                                                                                                                                                                                                                                                                                                                                                                                                                                                                                                                                                                                                                          |          |                          |             |                          |          |                          |             |                          |          |                          |             |                          |
| ຄວາມຕ້ອງການ ຫຼື ຄວາມນິຍົມຂອງລູກຄ້າ                                                                                                                                                         | E                                                                                                                                                                                                                               |                                                                                                                                                                                                                                                                                                                                                                                                                                                                                                                                                                                                                                                                                                                     |             |   |        |   |                   |   |         |   |                                    |   |                                |   |                               |   |                                        |   |        |   |       |   |                                                                                                                                                                                                                                                                                                                                                                                                                                                                                                                                                                                                                                                                                                                                                                                                                                                                                                                                                                                                          |          |                          |             |                          |          |                          |             |                          |          |                          |             |                          |
| ຊື່ສຽງທາງບວກຂອງເຄື່ອງໝາຍສິນຄ້າ                                                                                                                                                             | F                                                                                                                                                                                                                               |                                                                                                                                                                                                                                                                                                                                                                                                                                                                                                                                                                                                                                                                                                                     |             |   |        |   |                   |   |         |   |                                    |   |                                |   |                               |   |                                        |   |        |   |       |   |                                                                                                                                                                                                                                                                                                                                                                                                                                                                                                                                                                                                                                                                                                                                                                                                                                                                                                                                                                                                          |          |                          |             |                          |          |                          |             |                          |          |                          |             |                          |
| ໄດ້ຮັບການສັ່ງໂດຍທ່ານໝໍເລື້ອຍໆ                                                                                                                                                              | G                                                                                                                                                                                                                               |                                                                                                                                                                                                                                                                                                                                                                                                                                                                                                                                                                                                                                                                                                                     |             |   |        |   |                   |   |         |   |                                    |   |                                |   |                               |   |                                        |   |        |   |       |   |                                                                                                                                                                                                                                                                                                                                                                                                                                                                                                                                                                                                                                                                                                                                                                                                                                                                                                                                                                                                          |          |                          |             |                          |          |                          |             |                          |          |                          |             |                          |
| ໄດ້ຮັບຜົນດີທີ່ສຸດສຳລັບການປົວໄຂ້ມາເລເລຍ                                                                                                                                                     | H                                                                                                                                                                                                                               |                                                                                                                                                                                                                                                                                                                                                                                                                                                                                                                                                                                                                                                                                                                     |             |   |        |   |                   |   |         |   |                                    |   |                                |   |                               |   |                                        |   |        |   |       |   |                                                                                                                                                                                                                                                                                                                                                                                                                                                                                                                                                                                                                                                                                                                                                                                                                                                                                                                                                                                                          |          |                          |             |                          |          |                          |             |                          |          |                          |             |                          |
| ບໍ່ຮູ້                                                                                                                                                                                     | X                                                                                                                                                                                                                               |                                                                                                                                                                                                                                                                                                                                                                                                                                                                                                                                                                                                                                                                                                                     |             |   |        |   |                   |   |         |   |                                    |   |                                |   |                               |   |                                        |   |        |   |       |   |                                                                                                                                                                                                                                                                                                                                                                                                                                                                                                                                                                                                                                                                                                                                                                                                                                                                                                                                                                                                          |          |                          |             |                          |          |                          |             |                          |          |                          |             |                          |
| ອື່ນໆ                                                                                                                                                                                      | Z                                                                                                                                                                                                                               |                                                                                                                                                                                                                                                                                                                                                                                                                                                                                                                                                                                                                                                                                                                     |             |   |        |   |                   |   |         |   |                                    |   |                                |   |                               |   |                                        |   |        |   |       |   |                                                                                                                                                                                                                                                                                                                                                                                                                                                                                                                                                                                                                                                                                                                                                                                                                                                                                                                                                                                                          |          |                          |             |                          |          |                          |             |                          |          |                          |             |                          |
| 1 = ແມ່ນ                                                                                                                                                                                   | <input type="checkbox"/>                                                                                                                                                                                                        |                                                                                                                                                                                                                                                                                                                                                                                                                                                                                                                                                                                                                                                                                                                     |             |   |        |   |                   |   |         |   |                                    |   |                                |   |                               |   |                                        |   |        |   |       |   |                                                                                                                                                                                                                                                                                                                                                                                                                                                                                                                                                                                                                                                                                                                                                                                                                                                                                                                                                                                                          |          |                          |             |                          |          |                          |             |                          |          |                          |             |                          |
| 0 = ບໍ່ແມ່ນ                                                                                                                                                                                | <input type="checkbox"/>                                                                                                                                                                                                        |                                                                                                                                                                                                                                                                                                                                                                                                                                                                                                                                                                                                                                                                                                                     |             |   |        |   |                   |   |         |   |                                    |   |                                |   |                               |   |                                        |   |        |   |       |   |                                                                                                                                                                                                                                                                                                                                                                                                                                                                                                                                                                                                                                                                                                                                                                                                                                                                                                                                                                                                          |          |                          |             |                          |          |                          |             |                          |          |                          |             |                          |
| 1 = ແມ່ນ                                                                                                                                                                                   | <input type="checkbox"/>                                                                                                                                                                                                        |                                                                                                                                                                                                                                                                                                                                                                                                                                                                                                                                                                                                                                                                                                                     |             |   |        |   |                   |   |         |   |                                    |   |                                |   |                               |   |                                        |   |        |   |       |   |                                                                                                                                                                                                                                                                                                                                                                                                                                                                                                                                                                                                                                                                                                                                                                                                                                                                                                                                                                                                          |          |                          |             |                          |          |                          |             |                          |          |                          |             |                          |
| 0 = ບໍ່ແມ່ນ                                                                                                                                                                                | <input type="checkbox"/>                                                                                                                                                                                                        |                                                                                                                                                                                                                                                                                                                                                                                                                                                                                                                                                                                                                                                                                                                     |             |   |        |   |                   |   |         |   |                                    |   |                                |   |                               |   |                                        |   |        |   |       |   |                                                                                                                                                                                                                                                                                                                                                                                                                                                                                                                                                                                                                                                                                                                                                                                                                                                                                                                                                                                                          |          |                          |             |                          |          |                          |             |                          |          |                          |             |                          |
| 1 = ແມ່ນ                                                                                                                                                                                   | <input type="checkbox"/>                                                                                                                                                                                                        |                                                                                                                                                                                                                                                                                                                                                                                                                                                                                                                                                                                                                                                                                                                     |             |   |        |   |                   |   |         |   |                                    |   |                                |   |                               |   |                                        |   |        |   |       |   |                                                                                                                                                                                                                                                                                                                                                                                                                                                                                                                                                                                                                                                                                                                                                                                                                                                                                                                                                                                                          |          |                          |             |                          |          |                          |             |                          |          |                          |             |                          |
| 0 = ບໍ່ແມ່ນ                                                                                                                                                                                | <input type="checkbox"/>                                                                                                                                                                                                        |                                                                                                                                                                                                                                                                                                                                                                                                                                                                                                                                                                                                                                                                                                                     |             |   |        |   |                   |   |         |   |                                    |   |                                |   |                               |   |                                        |   |        |   |       |   |                                                                                                                                                                                                                                                                                                                                                                                                                                                                                                                                                                                                                                                                                                                                                                                                                                                                                                                                                                                                          |          |                          |             |                          |          |                          |             |                          |          |                          |             |                          |

ເຈ້ຍກວດສອບ ຢາເມັດ, ຢາຍັດ, ຢາຝຸ່ນເປັນຊອງ (TSG) [ ]-[ ]-[ ]-[ ]-[ ]-[ ]-[ ]-[ ]-[ ]-[ ]-[ ]



ເຈ້ຍກວດສອບຢາທີ່ບໍ່ແມ່ນຊະນິດເມັດ (NT): ຢານໍ້າເຊື່ອມ, ຢານໍ້າແຂວນຕະກອນ, ຢາສັກ & ອື່ນໆ ລະຫັດຮ້ານຈໍາໜ່າຍ: [ ]-[ ]-[ ]-[ ]-[ ]-[ ]

|                                                                       |                                  |                                                  |                                                                                                                                                                                                                                                                                     |                                                                                                                                        |                                                                                                                                                                                                                                    |                                                                                                                                        |
|-----------------------------------------------------------------------|----------------------------------|--------------------------------------------------|-------------------------------------------------------------------------------------------------------------------------------------------------------------------------------------------------------------------------------------------------------------------------------------|----------------------------------------------------------------------------------------------------------------------------------------|------------------------------------------------------------------------------------------------------------------------------------------------------------------------------------------------------------------------------------|----------------------------------------------------------------------------------------------------------------------------------------|
| <p>ລະຫັດໜ່ວຍງານຍ່ອຍ</p> <p>[ ]</p> <p>ໝາຍເລກຜະລິດຕະພັນ</p> <p>[ ]</p> | <p>[ ]</p> <p>[ ]</p> <p>[ ]</p> | <p>1. ຊື່ຕົວຢ່າ</p> <hr/> <hr/> <hr/> <p>[ ]</p> | <p>2. ຄວາມແຮງ</p> <p>[ ] [ ] [ ] [ ] [ ] (mg) / [ ] [ ] [ ] [ ] (mL)</p> <p>[ ] [ ] [ ] [ ] [ ] (mg) / [ ] [ ] [ ] [ ] (mL)</p> <p>[ ] [ ] [ ] [ ] [ ] (mg) / [ ] [ ] [ ] [ ] (mL)</p> <p>(ໝາຍເຫດ: ຖ້າແມ່ນຢາສັກທີ່ເປັນປະເພດຝຸ່ນ, ໃຫ້ບັນທຶກໃສ່ຫ້ອງ mg ແລະ ບໍ່ໃຫ້ຕື່ມໃສ່ຫ້ອງ mL.)</p> | <p>2a. ມີເປັນຄ່າຄວາມແຮງພື້ນຖານບໍ່?</p> <p>[ ]</p> <p>[ ]</p> <p>[ ]</p> <p>ຖ້າ ບໍ່ແມ່ນ ຫຼື ໝາຍ "0", ໃຫ້ລະບຸສານເຄມີປະສົມ</p> <p>[ ]</p> | <p>3. ຮູບແບບຢາ/ປະເພດ</p> <p>1 = ຢານໍ້າເຊື່ອມ</p> <p>2 = ຢານໍ້າແຂວນຕະກອນ</p> <p>3 = ຢາສັກທີ່ເປັນປະເພດນໍ້າ</p> <p>4 = ຢາສັກທີ່ເປັນປະເພດຝຸ່ນ</p> <p>5 = ຢາຢອດ</p> <p>6 = ອື່ນໆ (ອະທິບາຍລະອຽດ)</p> <p>[ ]</p>                          |                                                                                                                                        |
| <p>4. ຊື່ການຄ້າ/ຊື່ຍີ່ຫໍ້</p> <p>(ລວມທັງຂໍ້ມູນນໍ້າໜັກ ແລະ ອາຍຸ)</p>   | <p>5. ຜູ້ຜະລິດ</p>               | <p>6. ປະເພດທີ່ຜະລິດ</p> <p>[ ]</p>               | <p>7. ຂະໜາດບັນຈຸພັນ (Package size)</p> <p>ທັງໝົດມີ</p> <p>[ ] [ ] [ ] [ ] [ ] mL</p> <p>(ຫຼື mg ສໍາລັບຢາສັກທີ່ເປັນປະເພດຝຸ່ນ) ໃນແຕ່ລະ:</p> <p>1 = ຂວດແກ້ວ</p> <p>2 = ຫຼອດແກ້ວສໍາລັບຢາສັກ</p> <p>[ ]</p>                                                                              | <p>9. ຜະລິດຕະພັນມີເຄື່ອງໝາຍໃບໄມ້ສີຂຽວບໍ່?</p> <p>1 = ແມ່ນ</p> <p>0 = ບໍ່ແມ່ນ</p> <p>8 = ບໍ່ຮູ້</p> <p>[ ]</p>                          | <p>10. ຈໍານວນທີ່ໄດ້ຂາຍ/ແຈກຢາຍໃຫ້ກັບລູກຄ້າບຸກຄົນໃນ 7 ມື້ທີ່ຜ່ານມາ</p> <p>ຮ້ານຈໍາໜ່າຍນີ້ໄດ້ຂາຍ/ແຈກຢາຍ</p> <p>[ ] [ ] [ ] [ ]</p> <p>ຂວດແກ້ວ ຫຼື ຫຼອດແກ້ວສໍາລັບຢາສັກ ໃນ 7 ມື້ທີ່ຜ່ານມາ</p> <p>ປະຕິເສດ = 9997</p> <p>ບໍ່ຮູ້ = 9998</p> | <p>11. ເຄີຍມີຢາບໍ່ມີໃນຮ້ານໃນຊ່ວງເວລາໃດໜຶ່ງໃນໄລຍະ 3 ເດືອນຜ່ານມາບໍ່?</p> <p>1 = ແມ່ນ</p> <p>0 = ບໍ່ແມ່ນ</p> <p>8 = ບໍ່ຮູ້</p> <p>[ ]</p> |



|                                                                                                                                                                                                                                                        |            |
|--------------------------------------------------------------------------------------------------------------------------------------------------------------------------------------------------------------------------------------------------------|------------|
| <p>A16_1. ປະຈຸບັນທ່ານມີຢາຕ້ານເຊື້ອໃດໆບໍ່ ຢູ່ໃນຮ້ານນີ້?</p> <p>1 = ແມ່ນ<br/>0 = ບໍ່ແມ່ນ ໄປຂໍ້ A17</p>                                                                                                                                                   | <p>[ ]</p> |
| <p>A16_2. ທ່ານມີຢາດ່ອກຊີຊີຄລິນ (doxycycline) ເປັນເມັດ/ແຄັບຊູບໃດໆບໍ່ ຢູ່ໃນຮ້ານນີ້?</p> <p><i>ເອົາບັດສະແດງໃຫ້ເບິ່ງ. ນັກສຳພາດ: ຂໍອະນຸຍາດເບິ່ງຜະລິດຕະພັນ ແລະ ຍັງຍິນວ່າມັນແມ່ນ doxycycline (ດ່ອກຊີຊີຄລິນ)</i></p> <p>1 = ແມ່ນ<br/>0 = ບໍ່ແມ່ນ ໄປຂໍ້ A17</p> | <p>[ ]</p> |
| <p>A16_3. ຄວາມແຮງເທົ່າໃດຂອງຢາ doxycycline (ດ່ອກຊີຊີຄລິນ) ໃນໜຶ່ງເມັດ/ແຄັບຊູນ ທີ່ທ່ານມີໃນຮ້ານນີ້?</p> <p><i>ອ່ານລາຍການ, ວົງມົນເອົາຄຳຕອບທີ່ກ່າວເຖິງ</i></p>                                                                                               |            |
| <p style="text-align: right;">100 mg</p>                                                                                                                                                                                                               | <p>A</p>   |
| <p style="text-align: right;">ບໍ່ຮູ້</p>                                                                                                                                                                                                               | <p>X</p>   |
| <p style="text-align: right;">ອື່ນໆ (ລະບຸ): [ _____ ]</p>                                                                                                                                                                                              | <p>Z</p>   |



A17a. ຊື່ ແລະ ສູດສະແດງຂອງຢາປິ່ນປົວພະຍາດໄຂ້ມາເລເລຍທີ່ບໍ່ມີຢູ່ໃນຮ້ານ (ຂາດສາງ) ນັ້ນແມ່ນຫຍັງ?

ໃຫ້ເບິ່ງບັນຊີລາຍຊື່ການຄ້າດັ່ງລຸ່ມນີ້ ເມື່ອຕື່ມຄຳຕອບໃນຂໍ້ທີ 4

| ລາຍການ ຢາປິ່ນປົວໄຂ້ມາເລເລຍຊະນິດດຽວ ອາເຕີມີຊີນິນ (Oral AMT) |                  |            |                    |
|------------------------------------------------------------|------------------|------------|--------------------|
| Artesunate                                                 |                  | Artemether | Dihydroartemisinin |
| AA-Artesunate(tab)                                         | Falcinate        | Atem       | Alaxin             |
| Artesunate (tab)                                           | ricn             | A-Artmthr  | Codisin            |
| ArthisAinae                                                | Gsunae           | meher      | Temexin            |
| Actitesunate                                               | Lever-Artesunate | Artemedine | Santecxin          |
| Adamsnate                                                  | MD-Artesunat     | Betamotil  |                    |
| Artemed                                                    | Pedisunate       |            |                    |
| Askasunate                                                 | Traphasunat      |            |                    |
| Cusnat-Artesunate                                          | Vatunate         |            |                    |
| Artesunat                                                  |                  |            |                    |
| Eurosunate                                                 |                  |            |                    |

|                                   |                                                                                                                                                                                                 |                                                                                                                                                                                                                                                                                                                                                                                                                            |                                                                                                                                                                                                                                                 |
|-----------------------------------|-------------------------------------------------------------------------------------------------------------------------------------------------------------------------------------------------|----------------------------------------------------------------------------------------------------------------------------------------------------------------------------------------------------------------------------------------------------------------------------------------------------------------------------------------------------------------------------------------------------------------------------|-------------------------------------------------------------------------------------------------------------------------------------------------------------------------------------------------------------------------------------------------|
| ໝາຍເລກ<br>ຢາຂາດສາງ<br><br>[ ] [ ] | 1. ຊື່ຕົວຢາ ຫຼື ຊື່ຍີ່ຫໍ້<br><br>[ ] [ ]<br><br>98 = ບໍ່ຮູ້                                                                                                                                     | ບໍ່ຕ້ອງຖາມຜູ້ໃຫ້ບໍລິການ.<br>4. ຢານີ້ມີຊື່ການຄ້າ/ຊື່ຍີ່ຫໍ້ ລວມຢູ່ໃນ ລາຍ<br>ການຢາກິນປິ່ນປົວໄຂ້ມາເລເລຍ ຊະນິດດຽວ<br>ອາເຕີມີຊີນິນ (Oral AMT) ຂ້າງເທິງ ນັ້ນ<br>ບໍ່?<br>1 = ແມ່ນ      0 = ບໍ່ແມ່ນ      [ ]<br>8 = ບໍ່ຮູ້<br>ຖ້າວ່າ "ແມ່ນ", ໃຫ້ຕື່ມພາກ ຢາກິນປິ່ນປົວ<br>ໄຂ້ມາເລເລຍ ຊະນິດດຽວອາເຕີມີຊີນິນ<br>(Oral AMT) ຫຼັງຈາກທີ່ພາກ "ຢາປິ່ນປົວ<br>ພະຍາດໄຂ້ມາເລເລຍ ທີ່ຂາດສາງ" ໄດ້ຖືກ<br>ຕື່ມຄົບແລ້ວ.<br><br>ຖ້າວ່າ "ບໍ່ແມ່ນ" ໄປຂໍ້ 5 | 6. ຢານີ້ມີສານອອກລົດພຽງຕົວດຽວບໍ່?<br>1 = ແມ່ນ      0 = ບໍ່      [ ]<br>8 = ບໍ່ຮູ້<br>ຖ້າ "ບໍ່ແມ່ນ" ຫຼື "ບໍ່ຮູ້" ໃຫ້ໄປຕໍ່ທີ່ຢາ<br>ອື່ນ.                                                                                                           |
|                                   | 2. ຮູບແບບຢາ/ສູດສະແດງ<br>01 = ຢາເມັດ<br>02 = ຢາຍັດ<br>03 = ຢາຝຸ່ນຝຸ່ນເປັນຊອງ<br>04 = ນໍ້າເຊືອມ<br>05 = ຢານໍ້າແຂວນຕະກອນ<br>06 = ຢາສັກ (ນໍ້າ ຫຼື ຝຸ່ນ)<br>07 = ຢາຢອດ<br>98 = ບໍ່ຮູ້<br><br>[ ] [ ] | 5. ຢານີ້ແມ່ນເປັນຢາເມັດບໍ່?<br>1 = ແມ່ນ      0 = ບໍ່ແມ່ນ      [ ]<br>8 = ບໍ່ຮູ້<br>ຖ້າ "ບໍ່ແມ່ນ" ຫຼື "ບໍ່ຮູ້" ໃຫ້ໄປຕໍ່ທີ່ຢາອື່ນ                                                                                                                                                                                                                                                                                             | 7. ສານອອກລົດນີ້ແມ່ນໜຶ່ງໃນສານຕໍ່ໄປ<br>ນີ້ບໍ່?<br><ul style="list-style-type: none"> <li>ອາເຕເມເທີ (ARTEMETHER)</li> <li>ອາເຕສູເນັດ (ARTESUNATE)</li> <li>ດີຮາຍໂດອາເຕມີຊີນິນ<br/>(DIHYDROARTEMISININ)</li> </ul> 1 = ແມ່ນ      [ ]<br>0 = ບໍ່ແມ່ນ |
|                                   | 3. ທ່ານມີແຜນທີ່ຈະຊື້ຢານີ້ຕື່ມອີກບໍ່?<br>1 = ແມ່ນ<br>0 = ບໍ່ແມ່ນ      [ ]<br>8 = ບໍ່ຮູ້                                                                                                          |                                                                                                                                                                                                                                                                                                                                                                                                                            | ຖ້າວ່າ "ແມ່ນ", ໃຫ້ຕື່ມພາກ ຢາກິນ<br>ປິ່ນປົວໄຂ້ມາເລເລຍ ຊະນິດດຽວອາເຕີມີ<br>ຊີນິນ (Oral AMT) ຫຼັງຈາກທີ່ພາກ<br>"ຢາປິ່ນປົວພະຍາດໄຂ້ມາເລເລຍ ທີ່ຂາດ<br>ສາງ" ໄດ້ຖືກຕື່ມຄົບແລ້ວ                                                                            |

A17a. ຊີ ແລະ ສູດສະແດງຂອງຢາປິ່ນປົວພະຍາດໄຂ້ມາເລເລຍທີ່ບໍ່ມີຢູ່ໃນຮ້ານ (ຂາດສາງ) ນັ້ນແມ່ນຫຍັງ?

ໃຫ້ເບິ່ງບັນຊີລາຍຊື່ການຄ້າດັ່ງລຸ່ມນີ້ ເມື່ອຕື່ມຄຳຕອບໃນຂໍ້ທີ 4

ລາຍການ ຢາປິ່ນປົວໄຂ້ມາເລເລຍຊະນິດດຽວ ອາເຕີມີຊີນິນ (Oral AMT)

| Artesunate         | Artemether       | Dihydroartemisinin |
|--------------------|------------------|--------------------|
| AA-Artesunate(tab) | Falcinate        | Alaxin             |
| Artesunate (tab)   | ricn             | Codisin            |
| ArthesisAinae      | Gsunae           | Temexin            |
| Actitesunate       | Lever-Artesunate | Santecxin          |
| Adamsnate          | MD-Artesunat     |                    |
| Artemed            | Pedisunate       |                    |
| Askasunate         | Traphasunat      |                    |
| Cusnat-Artesunate  | Vatunate         |                    |
| Artesunat          |                  |                    |
| Eurosunate         |                  |                    |

|                               |                                                                                                                                                                                             |                                                                                                                                                                                                        |                                                                                                                                                                                                                                         |
|-------------------------------|---------------------------------------------------------------------------------------------------------------------------------------------------------------------------------------------|--------------------------------------------------------------------------------------------------------------------------------------------------------------------------------------------------------|-----------------------------------------------------------------------------------------------------------------------------------------------------------------------------------------------------------------------------------------|
| ໝາຍເລກ<br>ຢາຂາດສາງ<br>[ ] [ ] | 1. ຊີຕົວຢາ ຫຼື ຊີຍີ່ຫໍ້<br>[ ]<br>98 = ບໍ່ຮູ້                                                                                                                                               | ບໍ່ຕ້ອງຖາມຜູ້ໃຫ້ບໍລິການ.<br>4. ຢາທີ່ມີຊື່ການຄ້າ/ຊີຍີ່ຫໍ້ ລວມຢູ່ໃນ ລາຍການຢາກິນປິ່ນປົວໄຂ້ມາເລເລຍ ຊະນິດດຽວ ອາເຕີມີຊີນິນ (Oral AMT) ຂ້າງເທິງ ນັ້ນ ບໍ່?<br>1 = ແມ່ນ      0 = ບໍ່ແມ່ນ      [ ]<br>8 = ບໍ່ຮູ້ | 6. ຢາທີ່ມີສານອອກລິດພຽງຕົວດຽວບໍ່?<br>1 = ແມ່ນ      0 = ບໍ່      [ ]<br>8 = ບໍ່ຮູ້<br>ຖ້າ "ບໍ່ແມ່ນ" ຫຼື "ບໍ່ຮູ້" ໃຫ້ໄປຕໍ່ທີ່ຢາອື່ນ.                                                                                                       |
|                               | 2. ຮູບແບບຢາ/ສູດສະແດງ<br>01 = ຢາເມັດ<br>02 = ຢາຍັດ<br>03 = ຢາຝຸ່ນຝຸ່ນເປັນຊອງ<br>04 = ນໍ້າເຊືອມ<br>05 = ຢານໍ້າແຂວນຕະກອນ<br>06 = ຢາລັກ (ນໍ້າ ຫຼື ຝຸ່ນ)<br>07 = ຢາຢອດ<br>98 = ບໍ່ຮູ້<br>[ ] [ ] | ຖ້າວ່າ "ແມ່ນ", ໃຫ້ຕື່ມພາກ ຢາກິນປິ່ນປົວໄຂ້ມາເລເລຍ ຊະນິດດຽວອາເຕີມີຊີນິນ (Oral AMT) ຫຼັງຈາກທີ່ພາກ "ຢາປິ່ນປົວພະຍາດໄຂ້ມາເລເລຍ ທີ່ຂາດສາງ" ໄດ້ຖືກຕື່ມຄົບແລ້ວ.<br>ຖ້າວ່າ "ບໍ່ແມ່ນ" ໄປຂໍ້ 5                     | 7. ສານອອກລິດນີ້ແມ່ນໜຶ່ງໃນສານຕໍ່ໄປນີ້ບໍ່?<br><ul style="list-style-type: none"> <li>ອາເຕເມເທີ (ARTEMETHER)</li> <li>ອາເຕສູເນັດ (ARTESUNATE)</li> <li>ດີຮາຍໂດອາເຕມີຊີນິນ (DIHYDROARTEMISININ)</li> </ul> 1 = ແມ່ນ      [ ]<br>0 = ບໍ່ແມ່ນ |
|                               | 3. ທ່ານມີແຜນທີ່ຈະຊື້ຢາທີ່ຕື່ມອີກບໍ່?<br>1 = ແມ່ນ<br>0 = ບໍ່ແມ່ນ      [ ]<br>8 = ບໍ່ຮູ້                                                                                                      | 5. ຢາທີ່ແມ່ນເປັນຢາເມັດບໍ່?<br>1 = ແມ່ນ      0 = ບໍ່ແມ່ນ      [ ]<br>8 = ບໍ່ຮູ້<br>ຖ້າ "ບໍ່ແມ່ນ" ຫຼື "ບໍ່ຮູ້" ໃຫ້ໄປຕໍ່ທີ່ຢາອື່ນ                                                                         | ຖ້າວ່າ "ແມ່ນ", ໃຫ້ຕື່ມພາກ ຢາກິນປິ່ນປົວໄຂ້ມາເລເລຍ ຊະນິດດຽວອາເຕີມີຊີນິນ (Oral AMT) ຫຼັງຈາກທີ່ພາກ "ຢາປິ່ນປົວພະຍາດໄຂ້ມາເລເລຍ ທີ່ຂາດສາງ" ໄດ້ຖືກຕື່ມຄົບແລ້ວ                                                                                   |

|                                                                                                                                                                                                                                                                                                                                                                                                                                                                                                                                                                                                                                                                                                      |            |
|------------------------------------------------------------------------------------------------------------------------------------------------------------------------------------------------------------------------------------------------------------------------------------------------------------------------------------------------------------------------------------------------------------------------------------------------------------------------------------------------------------------------------------------------------------------------------------------------------------------------------------------------------------------------------------------------------|------------|
| <p>A20. <b>ບໍ່ຕ້ອງອ່ານ.</b> ພົບຢາກິນປິ່ນປົວໄຂ້ຍຸງຊະນິດດຸ່ງວອາເຕີຊີນິນ (Oral AMT) ໃນພາກກວດສອບຢາປິ່ນປົວໄຂ້ມາເລເລຍ ຫຼື ໃນຄຳຖາມຂໍ້ A17a (Stock out) ບໍ່?</p> <p>1 = ແມ່ນ <b>ຕື່ມພາກ ຢາກິນປິ່ນປົວໄຂ້ຍຸງຊະນິດດຸ່ງວອາເຕີຊີນິນ (Oral AMT) ຊະນິດກິນ ສຳລັບຢາກິນປິ່ນປົວໄຂ້ຍຸງຊະນິດດຸ່ງວອາເຕີຊີນິນ ແຕ່ລະອັນທີ່ມີ.</b></p> <p><b>ພາກ ຢາກິນປິ່ນປົວໄຂ້ຍຸງຊະນິດດຸ່ງວອາເຕີຊີນິນ (Oral AMT) ຈະຖືກຕື່ມສຳລັບ:</b></p> <p>1) ຜະລິດຕະພັນ ຢາເມັດ, ຢາຍັດ, ຢາຜຸ່ນເປັນຊອງ (TSG) ທີ່ໄດ້ຖືກກວດສອບທີ່ມີຄຳຕອບແມ່ນ 1 ສຳລັບຄຳຖາມ 16a, 16b and 16c.</p> <p>2) ຜະລິດຕະພັນທັງໝົດທີ່ບໍ່ມີໃນຮ້ານ (ຂາດສາງ) ໃນປະຈຸບັນ ທີ່ມີຄຳຕອບແມ່ນເລກ 1 ໃນຄຳຖາມຂໍ້ A17a , ຂໍ້ທີ 4 ແລະ ຂໍ້ທີ 7.</p> <p>0 = ບໍ່ແມ່ນ <b>ໄປພາກທີ 4: ກວດສອບການບົ່ງມະຕິ</b></p> | <p>[ ]</p> |
|------------------------------------------------------------------------------------------------------------------------------------------------------------------------------------------------------------------------------------------------------------------------------------------------------------------------------------------------------------------------------------------------------------------------------------------------------------------------------------------------------------------------------------------------------------------------------------------------------------------------------------------------------------------------------------------------------|------------|

**ພາກທີ 4: ການກວດສອບການບົ່ງມະຕິ**

ພາກນີ້ແມ່ນເບິ່ງກ່ຽວກັບການມີແນວກວດເລືອດຫາເຊື້ອໄຂ້ມາເລເລຍ . ການຕອບຄຳຖາມເຫຼົ່ານີ້ອາດຮຽກຮ້ອງໃຫ້ມີການລົມກັບພະນັກງານໃນຮ້ານຈຳໜ່າຍຫຼາຍກວ່າ 1 ຄົນ. ຖ້າຜູ້ຖືກສອບຖາມບໍ່ຮູ້ຄຳຕອບສຳລັບຄຳຖາມໃນພາກນີ້, ຂໍລົມກັບພະນັກງານຄົນອື່ນໆທີ່ສາມາດໃຫ້ຂໍ້ມູນໄດ້.

|                                                                                                                                                                                                                                          |                    |
|------------------------------------------------------------------------------------------------------------------------------------------------------------------------------------------------------------------------------------------|--------------------|
| <p>D1. ໃນປະຈຸບັນ ຮ້ານຈຳໜ່າຍ/ສະຖານທີ່ບໍລິການແຫ່ງນີ້ ມີຖົງມືທີ່ໃຊ້ຄັງດຽວແລ້ວຖິ້ມ ສຳລັບພະນັກງານເພື່ອໃຊ້ໃນການກວດລູກຄ້າ/ຄົນເຈັບບໍ່?</p> <p>1 = ມີ</p> <p>0 = ບໍ່ມີ</p> <p>8 = ບໍ່ຮູ້</p>                                                      | <p>[ ]</p>         |
| <p>D2. ຮ້ານຈຳໜ່າຍ/ສະຖານທີ່ບໍລິການແຫ່ງນີ້ ມີທີ່ເກັບມ້ຽນຂອງແຫຼມຄົມ, ຫຼື ທີ່ຖືກຮ້ອງວ່າ ກັບທີ່ຖິ້ມຂອງແຫຼມຄົມ ຫຼື ກັບນິລະໄພ, ທີ່ມີພ້ອມໃນປະຈຸບັນ ສຳລັບໃຫ້ພະນັກງານໄດ້ນຳໃຊ້ບໍ່?</p> <p>1 = ມີ</p> <p>0 = ບໍ່ມີ</p> <p>8 = ບໍ່ຮູ້</p>             | <p>[ ]</p>         |
| <p>D3. ມື້ນີ້, ຢູ່ທີ່ນີ້ ມີການກວດຫາເຊື້ອໄຂ້ມາເລເລຍ ດ້ວຍກ້ອງຈຸລະທັດບໍ່?</p> <p>1 = ມີ</p> <p>0 = ບໍ່ມີ <b>ໄປຂໍ້ D6a</b></p>                                                                                                               | <p>[ ]</p>         |
| <p>D4. ມີຈັກຄົນທີ່ໄດ້ຮັບການກວດຫາ <b>ເຊື້ອໄຂ້ມາເລເລຍ</b> ທີ່ຮ້ານຈຳໜ່າຍ/ສະຖານທີ່ບໍລິການແຫ່ງນີ້ ດ້ວຍການໃຊ້ກ້ອງຈຸລະທັດພາຍໃນ 7 ມື້ທີ່ຜ່ານມາ?</p> <p>997 = ປະຕິເສດ ; 998 = ບໍ່ຮູ້</p>                                                          | <p>[ ] [ ] [ ]</p> |
| <p>D5. ລາຄາທັງໝົດ ສຳລັບການກວດດ້ວຍກ້ອງຈຸລະທັດ ເພື່ອຊອກຫາເຊື້ອໄຂ້ມາເລເລຍ ສຳລັບຜູ້ໃຫຍ່ແມ່ນເທົ່າໃດ:</p> <p>[ ] [ ] [ ] [ ] [ ] [ ] [ ] [ ] ກີບ</p> <p><b>ບໍ່ເສຍຄ່າ = 000000; ບໍ່ມີຂໍ້ມູນ = 999995; ປະຕິເສດ = 999997; ບໍ່ຮູ້ = 999998</b></p> |                    |





D8. ກະລຸນາເອົາເຈ້ຍຈຸ່ມບົ່ງມະຕິແບບວ່ອງໄວ ທີ່ທ່ານມີຢູ່ໃນຮ້ານໃນປະຈຸບັນນີ້ໃຫ້ພວກເຮົາເບິ່ງແດ່. ປະຈຸບັນນີ້, ທ່ານມີອັນໃດອັນໜຶ່ງດັ່ງຕໍ່ໄປນີ້ບໍ່?

**ອ່ານບັນຊີລາຍຊື່ທັງໝົດຂ້າງລຸ່ມນີ້; ບໍ່ຕ້ອງບັນທຶກຫຍັງທັງສິ້ນໃນຂໍ້ນີ້**

- ແອກຄິວເຣດ Accurate, ແຄສະຕາດ Carestart, ຄຼັງຈິນ Clungene, ເພີດສ໌ເຣດສ໌ປອນ First Response, ມາລາເຊັກ Malachek, ວັນສະເຕັບ One Step, ພາຣາຮິດ ParaHit, ພາຣາເຊັກ Paracheck, ເອດສ໌ດີ ໄບໂອລາຍ SD Bioline, ຮິວມາຊິສ Humasis, ໄດອາແລັບ Dialab , ຄອມໂບ ອາດີທີ Combo-RDT

**ສືບຕໍ່ການກວດສອບ ເຈ້ຍຈຸ່ມບົ່ງມະຕິແບບວ່ອງໄວ**

ຖ້າໄດ້ໃຊ້ແບບຟອມການກວດສອບເພີ່ມເຕີມ, ເພີ່ມແບບຟອມເຫຼົ່ານີ້ເພື່ອຮັບໄດ້ສະໜອງໃຫ້ ແລະ ຫນົບກະລັບເພີ່ມລວມກັນ. ທຸກໜ້າເຈ້ຍຄວນໄດ້ຮັບການຈັດລຽງກ່ອນທີ່ທ່ານຈະຍ້າຍໄປທີ່ຮ້ານຕໍ່ໄປ.

ໃຫ້ໝາຍເລກ ເຈ້ຍຈຸ່ມບົ່ງມະຕິແບບວ່ອງໄວ ແຕ່ລະອັນໂດຍລະບຸໝາຍເລກຜະລິດຕະພັນ.

ໃຫ້ໝາຍເລກແບບຟອມການກວດສອບແຕ່ລະອັນໃສ່ໃນບ່ອນວ່າງທີ່ຈັດກຽມໄວ້ດ້ານລຸ່ມຂອງໜ້າເຈ້ຍ

ໃນຮ້ານຈຳໜ່າຍທັງໝົດ, ຕື່ມ ລະຫັດໜ່ວຍງານຍ່ອຍ (ພ້ອມທັງໝາຍເລກຜະລິດຕະພັນ) ສຳລັບຢາແຕ່ລະຕົວທີ່ໄດ້ຖືກກວດສອບ. ລະຫັດໜ່ວຍງານຍ່ອຍ ເຫຼົ່ານີ້ແມ່ນຢູ່ຂ້າງລຸ່ມນີ້

| ລະຫັດໜ່ວຍງານຍ່ອຍ |                                                                                                                                                                            |
|------------------|----------------------------------------------------------------------------------------------------------------------------------------------------------------------------|
| X                | ບັນດາຮ້ານຈຳໜ່າຍຕ່າງໆທີ່ມີ ຈຸດຈ່າຍ/ແຈກຢາຍຢາ ສຳລັບຢາປິ່ນປົວ/ການບົ່ງມະຕິ ຈຸດດຽວເທົ່ານັ້ນ.                                                                                     |
| A                | ພະແນກກວດເຂດນອກ / ບ່ອນຈ່າຍຢາ/ ຮ້ານຂາຍຢາຫຼັກ ( ທີ່ຄົນເຈັບທັງໝົດມາໃຊ້ບໍລິການ).                                                                                                |
| B                | ພະແນກກວດເຂດນອກສຳລັບຜູ້ໃຫຍ່/ບ່ອນຈ່າຍຢາສຳລັບຜູ້ໃຫຍ່/ຄລິນິກຜູ້ໃຫຍ່                                                                                                            |
| C                | ພະແນກກວດເຂດນອກສຳລັບເດັກ/ບ່ອນຈ່າຍຢາສຳລັບເດັກ/ຄລິນິກເດັກ                                                                                                                     |
| D                | ການຝາກທ້ອງ / ຄລິນິກສຳລັບແມ່ /ສຸຂະພາບແມ່ ແລະ ເດັກ                                                                                                                           |
| E                | ຄລິນິກບໍລິການປິ່ນປົວພະຍາດເອດສ໌ (ART) /ຄລິນິກ HIV/ ໂລກເອດສ໌AIDS                                                                                                             |
| F                | ພະແນກ ພະຍາດຕິດຕໍ່                                                                                                                                                          |
| G                | ພະແນກສຸກເສີນ                                                                                                                                                               |
| H                | ພະແນກຈ່າຍຢາທີ່ເປັນຂອງເອກະຊົນ ທີ່ຕັ້ງຢູ່ໃນສະຖານທີ່ບໍລິການສາທາລະນະສຸກຂອງລັດ                                                                                                  |
| I                | ໜ່ວຍງານວິເຄາະ (ສຳລັບການກວດບົ່ງມະຕິແບບວ່ອງໄວດ້ວຍເຈ້ຍຈຸ່ມ)                                                                                                                   |
| Z                | ອື່ນໆ (ລະບຸລະອຽດກ່ຽວກັບປະເພດ ໃນບ່ອນວ່າງສຳລັບທ້ອງຄຳເຫັນຢູ່ໃນເຈ້ຍກວດສອບເຈ້ຍກວດສອບ ຢາເມັດ, ຢາຍັດ, ຢາຜຸ່ນເປັນຊອງ (TSG) ຂໍ້ 15 ຫຼື ເຈ້ຍກວດສອບຢາທີ່ບໍ່ແມ່ນຊະນິດເມັດ (NT) ຂໍ້ 15) |

(Black page)

|                                                                                                                                                                                                                       |                                                                                                                                         |                                                                                                                                                                                                                                                                                                   |                                                                                                                                                                                                                                                                                                                                  |                                                                                                                                                                                                                                |                                                                                                                                                                                                                                                                                                                                                                                                                                                                                                                     |                                                      |                                  |                                                                                                                                                                          |
|-----------------------------------------------------------------------------------------------------------------------------------------------------------------------------------------------------------------------|-----------------------------------------------------------------------------------------------------------------------------------------|---------------------------------------------------------------------------------------------------------------------------------------------------------------------------------------------------------------------------------------------------------------------------------------------------|----------------------------------------------------------------------------------------------------------------------------------------------------------------------------------------------------------------------------------------------------------------------------------------------------------------------------------|--------------------------------------------------------------------------------------------------------------------------------------------------------------------------------------------------------------------------------|---------------------------------------------------------------------------------------------------------------------------------------------------------------------------------------------------------------------------------------------------------------------------------------------------------------------------------------------------------------------------------------------------------------------------------------------------------------------------------------------------------------------|------------------------------------------------------|----------------------------------|--------------------------------------------------------------------------------------------------------------------------------------------------------------------------|
| <p>ລະຫັດໜ່ວຍງານຍ່ອຍ</p> <p>[ ]</p> <p>ໝາຍເລກຜະລິດຕະພັນ</p> <p>[ ]</p>                                                                                                                                                 | <p>1. ຊື່ການຄ້າ ຫຼື ຊື່ຍີ່ຫໍ້</p>                                                                                                       | <p>2. ການກວດສານກໍ ພູມຕ້ານທານ (ກວດຫາ antigen)</p> <p>(ຂີດວົງອ້ອມເອົາທັງໝົດທີ່ ໝາະສົມ)</p> <p>HRP2            A</p> <p>pLDH            B</p> <p>Aldolase        C</p> <p>ບໍ່ລະບຸ            Z</p>                                                                                                   | <p>3. ປະເພດແມ່ກາຝາກ</p> <p>(ຂີດວົງອ້ອມເອົາທັງໝົດທີ່ ໝາະສົມ)</p> <p>Pf                    A</p> <p>Pv                    B</p> <p>Po                    C</p> <p>pm                   D</p> <p>pan                   E</p> <p>vom/Pvom        F</p> <p>ອື່ນໆ                G</p> <p>ລະບຸ [ ]</p> <p>ບໍ່ລະບຸ                Z</p> | <p>4. ຜູ້ຜະລິດ</p>                                                                                                                                                                                                             | <p>5. ປະເພດທີ່ຜະລິດ</p>                                                                                                                                                                                                                                                                                                                                                                                                                                                                                             | <p>5b. ໝາຍເລກລະຫັດ ຜະລິດຕະພັນ (Catalogue Number)</p> | <p>6. ໝາຍເລກໝວດ (Lot Number)</p> | <p>7. ມີແມ່ນຊຸດກວດດ້ວຍຕົວເອງບໍ່, ໃນແຕ່ລະຊຸດເຄື່ອງກວດປະກອບມີ ນ້ຳຢາ, ຫຼອດດູດເລືອດ ແລະ ແຜ່ນລາມ ມານຳບໍ່?</p> <p>1 = ແມ່ນ</p> <p>0 = ບໍ່ແມ່ນ</p> <p>8 = ບໍ່ຮູ້</p> <p>[ ]</p> |
| <p>13. ຈຳນວນຂອງຊຸດກວດທີ່ໄດ້ຈຳໜ່າຍໃຫ້ກັບລູກຄ້າລາຍຍ່ອຍ ໃນ 7 ມື້ທີ່ຜ່ານມາ (ບັນທຶກ ຈຳນວນ ທັງໝົດຂອງຊຸດກວດ)</p> <p>ໄດ້ຂາຍ/ແຈກຢາຍ</p> <p>[ ]</p> <p>ຊຸດກວດ ໃນ 7 ມື້ທີ່ຜ່ານມາ</p> <p>ປະຕິເສດ = 9997;</p> <p>ບໍ່ຮູ້ = 9998</p> | <p>14. ເຄື່ອງກວດນີ້ ບໍ່ມີໃນຮ້ານ ໃນເວລາໃດໜຶ່ງ ໄລຍະ 3 ເດືອນຜ່ານມາບໍ່?</p> <p>1 = ແມ່ນ</p> <p>0 = ບໍ່ແມ່ນ</p> <p>8 = ບໍ່ຮູ້</p> <p>[ ]</p> | <p>15a. ຮ້ານນີ້ນຳໃຊ້ ເຈ້ຍຈຸ່ມບົ່ງມະຕິແບບວ່ອງໄວຍີ່ຫໍ້ນີ້ ໃນການກວດລູກຄ້າ ທີ່ສະຖານທີ່ນີ້?</p> <p>1 = ແມ່ນ</p> <p>0 = ບໍ່ແມ່ນ    ໄປຂໍ້ 16a</p> <p>8 = ບໍ່ຮູ້        ໄປຂໍ້ 16a</p> <p>[ ]</p> <p>15b. ຖ້າແມ່ນ, ລາຄາການກວດທັງໝົດເທົ່າໃດ (ລວມທັງລາຄາຂອງ ຊຸດກວດ ແລະ ຄ່າບໍລິການ)</p> <p>[ ]</p> <p>ກີບ</p> | <p>16a. ຮ້ານນີ້ເອົາເຈ້ຍຈຸ່ມບົ່ງມະຕິແບບວ່ອງໄວ ຍີ່ຫໍ້ນີ້ໃຫ້ ລູກຄ້າໄປກວດຢູ່ບ່ອນອື່ນບໍ່?</p> <p>1 = ແມ່ນ</p> <p>0 = ບໍ່ແມ່ນ    ໄປຂໍ້ 17</p> <p>8 = ບໍ່ຮູ້        ໄປຂໍ້ 17</p> <p>[ ]</p> <p>16b. ຖ້າແມ່ນ, ຊຸດກວດດ້ວຍເຈ້ຍຈຸ່ມບົ່ງມະຕິແບບວ່ອງໄວນີ້ ມີລາຄາເທົ່າໃດ?</p> <p>[ ]</p> <p>ກີບ</p>                                            | <p>17. ລາຄາໃນການຊື້ຍົກ (ຄັງລ້າສຸດ)</p> <p>ຈຳນວນຊື້ຍົກ</p> <p>[ ]</p> <p>ຊຸດກວດ</p> <p>ລາຄາ</p> <p>[ ]</p> <p>ກີບ</p> <p>ບໍ່ເສຍຄ່າ = 0000000</p> <p>ບໍ່ໃສ່ຂໍ້ມູນ = 9999995</p> <p>ປະຕິເສດ = 9999997</p> <p>ບໍ່ຮູ້ = 9999998</p> | <p>18. ເປັນຫຍັງທ່ານຈຶ່ງມີ ແນວກວດດ້ວຍເຈ້ຍຈຸ່ມບົ່ງມະຕິແບບວ່ອງໄວນີ້ໄວ້ [ສະແດງ ແນວກວດບົ່ງມະຕິແບບວ່ອງໄວ]?</p> <p>ບໍ່ຕ້ອງອ່ານລາຍການຂີດວົງອ້ອມເອົາທຸກຄຳຕອບທີ່ຜູ້ຕອບກ່າວເຖິງ</p> <p>ໄດ້ມາລ້າງ                    A</p> <p>ກຳໄລດີ                        B</p> <p>ລັດຖະບານແນະນຳ        C</p> <p>ລາຄາຖືກ                        D</p> <p>ລູກຄ້າຖາມມາ                E</p> <p>ມີຊື່ສຽງດີ                      F</p> <p>ບໍ່ຮູ້                                X</p> <p>ອື່ນໆ                              Z</p> <p>ລະບຸ [ ]</p> | <p>19. ຄຳເຫັນອື່ນໆ</p>                               |                                  |                                                                                                                                                                          |

ແບບກວດສອບຊຸດກວດບົ່ງມະຕິແບບວ່ອງໄວ [ ] ຂອງ [ ]

|                                                                                                                                                                                                                                             |                                                                                                                                                           |                                                                                                                                                                                                                                                                                                            |                                                                                                                                                                                                                                                                                                                               |                                                                                                                                                                                                   |                                                                                                                                                                                                                                                                                                                                                                                                                                                               |                                                                  |                                      |                                                                                                                                                                                          |
|---------------------------------------------------------------------------------------------------------------------------------------------------------------------------------------------------------------------------------------------|-----------------------------------------------------------------------------------------------------------------------------------------------------------|------------------------------------------------------------------------------------------------------------------------------------------------------------------------------------------------------------------------------------------------------------------------------------------------------------|-------------------------------------------------------------------------------------------------------------------------------------------------------------------------------------------------------------------------------------------------------------------------------------------------------------------------------|---------------------------------------------------------------------------------------------------------------------------------------------------------------------------------------------------|---------------------------------------------------------------------------------------------------------------------------------------------------------------------------------------------------------------------------------------------------------------------------------------------------------------------------------------------------------------------------------------------------------------------------------------------------------------|------------------------------------------------------------------|--------------------------------------|------------------------------------------------------------------------------------------------------------------------------------------------------------------------------------------|
| <p>ລະຫັດ<br/>ໜ່ວຍງານ<br/>ຍ່ອຍ</p> <p>[ ]</p> <p>ໝາຍເລກ<br/>ຜະລິດຕະ<br/>ພັນ</p> <p>[ ]</p>                                                                                                                                                   | <p>1. ຊື່ການຄ້າ ຫຼື<br/>ຊື່ຍີ່ຫໍ້</p>                                                                                                                     | <p>2. ການກວດສານກໍ<br/>ພູມຕ້ານທານ (ກວດ<br/>ຫາ antigen)</p> <p>(ຂີດວົງອ້ອມເອົາທັງໝົດທີ່<br/>ເໝາະສົມ)</p> <p>HRP2            A</p> <p>pLDH            B</p> <p>Aldolase        C</p> <p>ບໍ່ລະບຸ            Z</p>                                                                                              | <p>3. ປະເພດແມ່ກາຝາກ<br/>(ຂີດວົງອ້ອມເອົາທັງໝົດທີ່ເໝາະສົມ)</p> <p>Pf                    A</p> <p>Pv                    B</p> <p>Po                    C</p> <p>pm                   D</p> <p>pan                   E</p> <p>vom/Pvom        F</p> <p>ອື່ນໆ                G</p> <p>ລະບຸ [ ]</p> <p>ບໍ່ລະບຸ                Z</p> | <p>4. ຜູ້ຜະລິດ</p>                                                                                                                                                                                | <p>5. ປະເພດທີ່ຜະລິດ</p>                                                                                                                                                                                                                                                                                                                                                                                                                                       | <p>5b. ໝາຍເລກລະຫັດ<br/>ຜະລິດຕະພັນ<br/>(Catalogue<br/>Number)</p> | <p>6. ໝາຍເລກໝວດ<br/>(Lot Number)</p> | <p>7. ມີແມ່ນຊຸດກວດ<br/>ດ້ວຍຕົວເອງບໍ່, ໃນ<br/>ແຕ່ລະຊຸດເຄື່ອງກວດ<br/>ປະກອບມີ ນ້ຳຢາ,<br/>ຫຼອດດູດເລືອດ ແລະ<br/>ແຜ່ນລາມ ມານຳບໍ່?<br/><br/>1 = ແມ່ນ<br/>0 = ບໍ່ແມ່ນ<br/>8 = ບໍ່ຮູ້<br/>[ ]</p> |
| <p>13. ຈຳນວນຂອງຊຸດ<br/>ກວດທີ່ໄດ້ຈຳໜ່າຍໃຫ້<br/>ກັບລູກຄ້າລາຍຍ່ອຍ ໃນ<br/>7 ມື້ທີ່ຜ່ານມາ<br/>(ບັນທຶກ ຈຳນວນ ທັງ<br/>ໝົດຂອງຊຸດກວດ)</p> <p>ໄດ້ຂາຍ/ແຈກຢາຍ<br/>[ ]</p> <p>ຊຸດກວດ ໃນ 7 ມື້ທີ່<br/>ຜ່ານມາ</p> <p>ປະຕິເສດ = 9997;<br/>ບໍ່ຮູ້ = 9998</p> | <p>14. ເຄື່ອງ<br/>ກວດນີ້ ບໍ່ມີໃນ<br/>ຮ້ານ ໃນເວລາ<br/>ໃດໜຶ່ງ ໄລຍະ<br/>3 ເດືອນຜ່ານ<br/>ມາບໍ່?</p> <p>1 = ແມ່ນ<br/>0 = ບໍ່ແມ່ນ<br/>8 = ບໍ່ຮູ້</p> <p>[ ]</p> | <p>15a. ຮ້ານນີ້ນຳໃຊ້ ເຈ້ຍຈຸ່ມ<br/>ບົ່ງມະຕິແບບວ່ອງໄວຍີ່ຫໍ້ນີ້ ໃນ<br/>ການກວດລູກຄ້າ ທີ່ສະຖານທີ່ນີ້?</p> <p>1 = ແມ່ນ<br/>0 = ບໍ່ແມ່ນ ໄປຂໍ້ 16a<br/>8 = ບໍ່ຮູ້ ໄປຂໍ້ 16a</p> <p>[ ]</p> <p>15b. ຖ້າແມ່ນ, ລາຄາການກວດ<br/>ທັງໝົດເທົ່າໃດ (ລວມທັງລາຄາ<br/>ຂອງ ຊຸດກວດ ແລະ ຄ່າ<br/>ບໍລິການ)</p> <p>[ ]</p> <p>ກີບ</p> | <p>16a. ຮ້ານນີ້ເອົາເຈ້ຍຈຸ່ມບົ່ງມະຕິ<br/>ແບບວ່ອງໄວ ຍີ່ຫໍ້ນີ້ໃຫ້ ລູກຄ້າໄປ<br/>ກວດຢູ່ບ່ອນອື່ນບໍ່?</p> <p>1 = ແມ່ນ<br/>0 = ບໍ່ແມ່ນ ໄປຂໍ້ 17<br/>8 = ບໍ່ຮູ້ ໄປຂໍ້ 17</p> <p>[ ]</p> <p>16b. ຖ້າແມ່ນ, ຊຸດກວດດ້ວຍເຈ້ຍ<br/>ຈຸ່ມບົ່ງມະຕິແບບວ່ອງໄວນີ້ ມີ<br/>ລາຄາເທົ່າໃດ?</p> <p>[ ]</p> <p>ກີບ</p>                                     | <p>17. ລາຄາໃນການຊື້ຍົກ (ຄັງລ້າສຸດ)</p> <p>ຈຳນວນຊື້ຍົກ<br/>[ ]</p> <p>ລາຄາ<br/>[ ]</p> <p>ກີບ</p> <p>ບໍ່ເສຍຄ່າ = 0000000<br/>ບໍ່ໃສ່ຂໍ້ມູນ = 9999995<br/>ປະຕິເສດ = 9999997<br/>ບໍ່ຮູ້ = 9999998</p> | <p>18. ເປັນຫຍັງທ່ານຈຶ່ງມີ ແນວ<br/>ກວດດ້ວຍເຈ້ຍຈຸ່ມບົ່ງມະຕິແບບ<br/>ວ່ອງໄວນີ້ໄວ້ [ສະແດງ ແນວກວດ<br/>ບົ່ງມະຕິແບບວ່ອງໄວ]?<br/>ບໍ່ຕ້ອງອ່ານລາຍການ<br/>ຂີດວົງອ້ອມເອົາທຸກຄຳຕອບທີ່ຜູ້<br/>ຕອບກ່າວເຖິງ</p> <p>ໄດ້ມາລ້າງ            A<br/>ກຳໄລດີ                B<br/>ລັດຖະບານແນະນຳ    C<br/>ລາຄາຖືກ                D<br/>ລູກຄ້າຖາມມາ            E<br/>ມີຊື່ສຽງດີ                F<br/>ບໍ່ຮູ້                        X<br/>ອື່ນໆ                        Z<br/>ລະບຸ [ ]</p> | <p>19. ຄຳ<br/>ເຫັນອື່ນໆ</p>                                      |                                      |                                                                                                                                                                                          |

ແບບກວດສອບຊຸດກວດບົ່ງມະຕິແບບວ່ອງໄວ [ ] ຂອງ [ ]

ເຈ້ຍຈຸ່ມບົ່ງມະຕິແບບວ່ອງໄວ ທີ່ບໍ່ມີໃນຮ້ານ (ຂາດສາງ)

|                                                                                                                                                                                                                                                                                                                                                                                 |            |
|---------------------------------------------------------------------------------------------------------------------------------------------------------------------------------------------------------------------------------------------------------------------------------------------------------------------------------------------------------------------------------|------------|
| <p>D9. ໃນມື້ນີ້, ມີເຈ້ຍຈຸ່ມບົ່ງມະຕິແບບວ່ອງໄວ ສຳລັບກວດເຊື່ອໄຂ້ມາເລເລຍ ທີ່ບໍ່ມີຢູ່ໃນຮ້ານບໍ່, ແຕ່ວ່າເຄີຍມີຢູ່ໃນຮ້ານ ໃນ <u>3 ເດືອນ</u>ຜ່ານມາ?</p> <p>1 = ມີ<br/>                 0 = ບໍ່ມີ           ໄປຂໍ້ D11<br/>                 8 = ບໍ່ຮູ້           ໄປຂໍ້ D11</p>                                                                                                              | <p>[ ]</p> |
| <p>D9a. ຜູ້ໃຫ້ບໍລິການຮູ້ຊື່ຍີ່ຫໍ້ຂອງ ເຈ້ຍຈຸ່ມບົ່ງມະຕິແບບວ່ອງໄວ ທີ່ບໍ່ມີຢູ່ໃນຮ້ານບໍ່ ບໍ່?</p> <p>1= ແມ່ນ<br/>                 0= ບໍ່ແມ່ນ           ໄປຂໍ້ D11</p>                                                                                                                                                                                                                 | <p>[ ]</p> |
| <p>D10. ຊື່ການຄ້າ/ຊື່ຍີ່ຫໍ້ ຂອງເຈ້ຍຈຸ່ມບົ່ງມະຕິແບບວ່ອງໄວ ກວດເຊື່ອໄຂ້ມາເລເລຍ ທີ່ບໍ່ມີໃນຮ້ານນີ້ ມີຊື່ການຄ້າ/ຊື່ຍີ່ຫໍ້ ວ່າແນວໃດ?</p> <p>0 = ບໍ່ແມ່ນ/ຜູ້ໃຫ້ບໍລິການບໍ່ຮູ້           ໄປຂໍ້ D11<br/>                 1 = ແມ່ນ,                                   ຊຸນລົງລະອຽດ ບັນທຶກໜຶ່ງຍີ່ຫໍ້ຕໍ່ແຖວ</p> <p>[ _____ ]<br/>                 [ _____ ]<br/>                 [ _____ ]</p> | <p>[ ]</p> |
| <p>D11. ສະຖານທີ່ບໍລິການ/ຮ້ານຈຳໜ່າຍແຫ່ງນີ້ໄດ້ໃຫ້ຈຳໜ່າຍ/ແຈກຢາຍຢາ ຫຼື ການອອກໃບສັງຢາບໍ່?</p> <p>1 = ແມ່ນ           ໄປພາກທີ 5: ພາກຜູ້ໃຫ້ບໍລິການ<br/>                 0 = ບໍ່ແມ່ນ       ຍືນຍັນຕຳຕອບໃນ S1 ຫຼື S2 ບໍ່ເທົ່າກັບ "1" ແລະ ປະເພດຮ້ານຄ້າທີ່ບັນທຶກໃນ<br/>                 C7 ແມ່ນ 17 ຫຼື "18" ("ຫ້ອງວິເຄາະເທົ່ານັ້ນ"). ໄປພາກທີ 6: ຟອມຕິດຕາມການກວດສອບ</p>                       | <p>[ ]</p> |

**ພາກທີ 5: ພາກຜູ້ໃຫ້ບໍລິການ**

*ພາກນີ້ແມ່ນສຳລັບພະນັກງານທີ່ອາດໂສທີ່ສຸດທີ່ຮັບຜິດຊອບການໃຫ້ບໍລິການການປິ່ນປົວ, ການອອກໃບສັງຢາ ຫຼື ໃຫ້ຢາສຳລັບລູກຄ້າ ຫຼືຄົນ ເຈັບ*

|                                                                                                                                                                                                                                                                                                                                                                                               |            |
|-----------------------------------------------------------------------------------------------------------------------------------------------------------------------------------------------------------------------------------------------------------------------------------------------------------------------------------------------------------------------------------------------|------------|
| <p>P1. ໜ້າທີ່ຮັບຜິດຊອບຂອງທ່ານໃນຮ້ານຈຳໜ່າຍ/ສະຖານທີ່ບໍລິການແຫ່ງນີ້ລວມມີ: ການອອກໃບສັງຢາ, ການປິ່ນປົວ, ຫຼື ໃຫ້ຢາແກ່ລູກຄ້າບໍ່?</p> <p>1 = ແມ່ນ<br/>ບໍ່ແມ່ນ <b>ຂໍລົມກັບຜູ້ທີ່ອາດໂສທີ່ສຸດໃນຮ້ານຈຳໜ່າຍທີ່ມີ 1 ຫຼື ຫຼາຍໜ້າທີ່ຮັບຜິດຊອບ</b></p>                                                                                                                                                          | <p>[ ]</p> |
| <p>P2. ທ່ານເຮັດວຽກທີ່ຮ້ານຈຳໜ່າຍ/ສະຖານບໍລິການນີ້ໄດ້ຈັກປີແລ້ວ? ຖ້າວ່າຕໍ່າກວ່າ 1 ປີ, ໃຫ້ຂຽນ 01</p>                                                                                                                                                                                                                                                                                               | <p>[ ]</p> |
| <p>P3. ປະຈຸບັນທ່ານອາຍຸຈັກປີແລ້ວ? ຂຽນອາຍຸເປັນປີ</p> <p>97 = ປະຕິເສດ<br/>98 = ບໍ່ຮູ້</p>                                                                                                                                                                                                                                                                                                        | <p>[ ]</p> |
| <p>P4. <b>ບໍ່ຕ້ອງອ່ານ:</b> ຜູ້ຖືກສຳພາດແມ່ນເພດຍິງ ຫຼື ເພດຊາຍ?</p> <p>1 = ເພດຊາຍ<br/>2 = ເພດຍິງ</p>                                                                                                                                                                                                                                                                                             | <p>[ ]</p> |
| <p>P5. ທ່ານຈົບການສຶກສາສູງສຸດລະດັບໃດ?</p> <p>1. = ບໍ່ໄດ້ເຂົ້າໂຮງຮຽນ<br/>2. = ຊັ້ນປະຖົມແຕ່ບໍ່ຈົບ<br/>3. = ຈົບຊັ້ນປະຖົມ<br/>4. = ຊັ້ນມັດທະຍົມແຕ່ບໍ່ຈົບ<br/>5. = ຈົບຊັ້ນມັດທະຍົມ<br/>6. = ຍັງບໍ່ຈົບມະຫາວິທະຍາໄລ/ວິທະຍາໄລ/ວິຊາຊີບ<br/>7. = ຈົບມະຫາວິທະຍາໄລ/ວິທະຍາໄລ/ວິຊາຊີບ</p>                                                                                                                    | <p>[ ]</p> |
| <p>P6. ມີໃຜໃນຮ້ານຈຳໜ່າຍແຫ່ງນີ້ບໍ່ (ລວມທັງທ່ານເອງ) ທີ່ໄດ້ຮັບການອົບຮົມໃນ 12 ເດືອນຜ່ານມາ ທີ່ລວມມີເນື້ອໃນກ່ຽວກັບການບົ່ງມະຕິພະຍາດໄຂ້ມາເລເລຍ , ລວມທັງການກວດບົ່ງມະຕິແບບວາງໄວສຳລັບພະຍາດໄຂ້ມາເລເລຍ ຫຼື ການໃຊ້ກ້ອງຈຸລະທັດ? <b>ລວມທັງການອົບຮົມໃນສະຖາບັນການຮຽນກ່ອນຈະເລີ່ມເຮັດວຽກຈິງ ແລະ ກອງປະຊຸມສຳມະນາວິຊາການຕ່າງໆ</b></p> <p>1 = ແມ່ນ<br/>0 = ບໍ່ແມ່ນ <b>ໄປຂໍ້ P7</b><br/>8 = ບໍ່ຮູ້ <b>ໄປຂໍ້ P7</b></p> | <p>[ ]</p> |
| <p>P6a. ອົງການຈັດຕັ້ງໃດທີ່ໄດ້ສະໜອງການອົບຮົມ ທີ່ລວມມີເນື້ອໃນກ່ຽວກັບການບົ່ງມະຕິພະຍາດໄຂ້ມາເລເລຍ ?<br/><b>ບໍ່ຕ້ອງອ່ານບັນຊີລາຍຊື່ ແລະ ຂີດວົງອ້ອມເອົາທັງໝົດທີ່ຜູ້ຕອບກ່າວເຖິງ</b><br/><b>ຖາມເຈາະຈົ້ມຖ້າຕອບແມ່ນ "ອົງກອນອື່ນໆ" ຈົນກວ່າຜູ້ຕອບ ຕອບຄົບຖ້ວນ</b></p>                                                                                                                                        |            |
| <p>I. ລັດຖະບານ / ກະຊວງສາທາລະນະສຸກ / ສູນໄຂ້ຍຸງ, ແມ່ກາຝາກ ແລະ ແມງໄມ້ (ໂຄງການມີສ່ວນຮ່ວມຂອງລັດ ແລະ ເອກະຊົນ)</p>                                                                                                                                                                                                                                                                                   | <p>A</p>   |
| <p>II. ອົງການອານາໄມໂລກ (WHO)</p>                                                                                                                                                                                                                                                                                                                                                              | <p>B</p>   |
| <p>III. ອົງການສຸຂະພາບ ແລະ ຫູດຜ່ອນຄວາມຍາກຈົນ (HPA)</p>                                                                                                                                                                                                                                                                                                                                         | <p>C</p>   |
| <p>IV. ອື່ນໆ, ລະບຸ [ ]</p>                                                                                                                                                                                                                                                                                                                                                                    | <p>X</p>   |

| V. ບໍ່ຮູ້                                                                                                                                                                                                                                                                                                                                            | Z   |
|------------------------------------------------------------------------------------------------------------------------------------------------------------------------------------------------------------------------------------------------------------------------------------------------------------------------------------------------------|-----|
| <p>P7. ມີໃຜໃນຮ້ານຈຳໜ່າຍແຫ່ງນີ້ (ລວມທັງທ່ານເອງ) ທີ່ໄດ້ຮັບການອົບຮົມໃນ 12 ເດືອນຜ່ານມາ ທີ່ລວມມີເນື້ອໃນກ່ຽວກັບຄູ່ມືການປິ່ນປົວພະຍາດໄຂ້ມາເລເລຍແຫ່ງຊາດ? <b>ລວມທັງການອົບຮົມໃນສະຖາບັນການຮຽນກ່ອນຈະເລີ່ມເຮັດວຽກຈິງ ແລະ ກອງປະຊຸມສຳມະນາວິຊາການຕ່າງໆ</b></p> <p>1 = ແມ່ນ<br/>0 = ບໍ່ແມ່ນ<br/>8 = ບໍ່ຮູ້</p> <p style="text-align: right;">ໄປຂໍ້ P8<br/>ໄປຂໍ້ P8</p> | [ ] |
| <p>P7a. ອົງການຈັດຕັ້ງໃດ ທີ່ໄດ້ສະໜອງການອົບຮົມກ່ຽວກັບ ຄູ່ມືການປິ່ນປົວພະຍາດໄຂ້ມາເລເລຍແຫ່ງຊາດ?<br/><b>ບໍ່ຕ້ອງອ່ານບັນຊີລາຍຊື່ ແລະ ຂີດວົງອ້ອມເອົາທັງໝົດທີ່ຜູ້ຕອບກ່າວເຖິງ</b><br/><b>ຖາມເຈາະຈົມຖ້າຕອບແມ່ນ "ອົງກອນອື່ນໆ" ຈົນກວ່າຜູ້ຕອບ ຕອບຄົບຖ້ວນ</b></p>                                                                                                    |     |
| I. ພາກລັດ / ກະຊວງສາທາລະນະສຸກ/ສູນໄຂ້ມາເລເລຍ ແມ່ກາຝາກ ແລະ ແມງໄມ້                                                                                                                                                                                                                                                                                       | A   |
| II. ອົງການສຸຂະພາບ ແລະ ຫູດຜ່ອນຄວາມຍາກຈົນ (HPA)                                                                                                                                                                                                                                                                                                        | B   |
| III. ອື່ນໆ, ລະບຸ [ ]                                                                                                                                                                                                                                                                                                                                 | X   |
| IV. ບໍ່ຮູ້                                                                                                                                                                                                                                                                                                                                           | Z   |
| <p>P8. ທ່ານມີຄຸນນະວຸດດ້ານສາທາລະນະສຸກດັ່ງຕໍ່ໄປນີ້ບໍ່?<br/><b>ບັນທຶກ 1 ສຳລັບ "ແມ່ນ"; 0 ສຳລັບ "ບໍ່ແມ່ນ"</b></p>                                                                                                                                                                                                                                         |     |
| I. ເພສັດຊະກອນ (ແພດການຢາ)                                                                                                                                                                                                                                                                                                                             | [ ] |
| II. ທ່ານໝີ                                                                                                                                                                                                                                                                                                                                           | [ ] |
| III. ແພດຊ່ວຍ                                                                                                                                                                                                                                                                                                                                         | [ ] |
| IV. ພະຍາບານ                                                                                                                                                                                                                                                                                                                                          | [ ] |
| V. ຜະດຸງຄັນ                                                                                                                                                                                                                                                                                                                                          | [ ] |
| VI. ວິຊາການຢູ່ຫ້ອງວິເຄາະ/ ຜູ້ຊ່ວຍຢູ່ຫ້ອງວິເຄາະ                                                                                                                                                                                                                                                                                                       | [ ] |
| VII. ຜູ້ຊ່ວຍເພສັດຊະກອນ (ຜູ້ຊ່ວຍແພດການຢາ)                                                                                                                                                                                                                                                                                                             | [ ] |
| VIII. ຜູ້ຊ່ວຍພະຍາບານ                                                                                                                                                                                                                                                                                                                                 | [ ] |
| IX. ພະນັກງານແພດຂັ້ນບ້ານ / ອາສາສະໝັກແພດຂັ້ນບ້ານ                                                                                                                                                                                                                                                                                                       | [ ] |
| <p>P9. ບໍ່ລວມຕົວທ່ານເອງ, ມີຄົນທີ່ເຮັດວຽກທີ່ຮ້ານຈຳໜ່າຍ ຫຼື ສະຖານທີ່ບໍລິການແຫ່ງນີ້ໄດ້ມີຄຸນນະວຸດດ້ານສາທາລະນະສຸກດັ່ງຕໍ່ໄປນີ້ບໍ່?<br/><b>ອ່ານບັນຊີລາຍຊື່ ແລະ ບັນທຶກ 1 ສຳລັບ "ແມ່ນ"; 0 ສຳລັບ "ບໍ່ແມ່ນ"; 8 ສຳລັບ "ບໍ່ຮູ້"</b></p>                                                                                                                           |     |
| I. ເພສັດຊະກອນ (ແພດການຢາ)                                                                                                                                                                                                                                                                                                                             | [ ] |
| II. ທ່ານໝີ                                                                                                                                                                                                                                                                                                                                           | [ ] |
| III. ແພດຊ່ວຍ                                                                                                                                                                                                                                                                                                                                         | [ ] |
| IV. ພະຍາບານ                                                                                                                                                                                                                                                                                                                                          | [ ] |
| V. ຜະດຸງຄັນ                                                                                                                                                                                                                                                                                                                                          | [ ] |
| VI. ວິຊາການຢູ່ຫ້ອງວິເຄາະ/ ຜູ້ຊ່ວຍຢູ່ຫ້ອງວິເຄາະ                                                                                                                                                                                                                                                                                                       | [ ] |
| VII. ຜູ້ຊ່ວຍເພສັດຊະກອນ (ຜູ້ຊ່ວຍແພດການຢາ)                                                                                                                                                                                                                                                                                                             | [ ] |
| VIII. ຜູ້ຊ່ວຍພະຍາບານ                                                                                                                                                                                                                                                                                                                                 | [ ] |
| IX. ພະນັກງານແພດຂັ້ນບ້ານ / ອາສາສະໝັກແພດຂັ້ນບ້ານ                                                                                                                                                                                                                                                                                                       | [ ] |





|                                                                                                                                                                                                                                                                                                                                                                                                                          |                                                       |
|--------------------------------------------------------------------------------------------------------------------------------------------------------------------------------------------------------------------------------------------------------------------------------------------------------------------------------------------------------------------------------------------------------------------------|-------------------------------------------------------|
| <p>M7. ຮ້ານຈຳໜ່າຍແຫ່ງນີ້ໄດ້ຮັບການສະໜັບສະໜູນ, ການລົງຢ້ຽມຢາມຊີ້ນຳ ຫຼື ການຕິດຕາມຊຸກຍູ້ຈາກອົງການຈັດຕັ້ງໃດ?</p> <p><b>ບໍ່ຕ້ອງອ່ານບັນຊີລາຍຊື່ ແລະ ຂີດວົງອ້ອມເອົາທັງໝົດທີ່ຜູ້ຕອບກ່າວເຖິງ</b></p> <p>I. ກະຊວງສາທາລະນະສຸກ/ສູນໄຂ້ຍຸງ ແມງໄມ້ແລະແມ່ກາຝາກ</p> <p>II. ກົມອາຫານ ແລະ ຢາ</p> <p>III. ຫ້ອງການພະແນກສາທາແຂວງ</p> <p>IV. ຫ້ອງການພະແນກສາທາເມືອງ</p> <p>V. ອົງການສຸຂະພາບ ແລະ ຫູດຜ່ອນຄວາມຍາກຈົນ (HPA)</p> <p>ອື່ນໆ, ລະບຸ [ ]</p> | <p>A</p> <p>B</p> <p>C</p> <p>D</p> <p>E</p> <p>X</p> |
| <p>M8. ຮ້ານຈຳໜ່າຍແຫ່ງນີ້ໄດ້ຮັບການສະໜັບສະໜູນ, ລົງຢ້ຽມຢາມຊີ້ນຳ ຫຼື ຕິດຕາມຊຸກຍູ້ເລື້ອຍປານໃດ?</p> <p>1 = ໜຶ່ງຄັ້ງ ຫຼື ຫຼາຍກວ່າ ຕໍ່ເດືອນ</p> <p>2 = ໜຶ່ງຄັ້ງຕໍ່ 3 ເດືອນ</p> <p>3 = ໜຶ່ງຄັ້ງຕໍ່ 6 ເດືອນ</p> <p>4 = ໜຶ່ງຄັ້ງຕໍ່ປີ</p> <p>5 = ອື່ນໆ, ລະບຸ [ ]</p>                                                                                                                                                                | <p>[ ]</p>                                            |
| <p>M9. ຮ້ານຈຳໜ່າຍແຫ່ງນີ້ໄດ້ບັນທຶກຂໍ້ມູນກ່ຽວກັບຈຳນວນຄົນເຈັບທີ່ໄດ້ຮັບການກວດຫາເຊື້ອໄຂ້ມາເລເລຍ ຫຼື ການປິ່ນປົວພະຍາດໄຂ້ມາເລເລຍ ບໍ່?</p> <p>1 = ແມ່ນ</p> <p>0 = ບໍ່ແມ່ນ <b>ໄປຂໍ້ P10</b></p> <p>8 = ບໍ່ຮູ້ <b>ໄປຂໍ້ P10</b></p>                                                                                                                                                                                                 | <p>[ ]</p>                                            |
| <p>M10. ຂ້າພະເຈົ້າຂໍເບິ່ງລະບົບ ຫຼື ປຶ້ມບັນທຶກທີ່ໃຊ້ບັນທຶກຂໍ້ມູນຄົນເຈັບດັ່ງກ່າວໄດ້ບໍ່?</p> <p><b>ໝາຍ 1 ຖ້າວ່າສັງເກດເຫັນປຶ້ມບັນທຶກ ຫຼື ໝາຍ 0 ຖ້າວ່າບໍ່ສັງເກດເຫັນປຶ້ມບັນທຶກ</b></p> <p>1 = ສັງເກດເຫັນລະບົບ ຫຼື ປຶ້ມບັນທຶກ</p> <p>0 = ບໍ່ສັງເກດເຫັນລະບົບ ຫຼື ປຶ້ມບັນທຶກ</p>                                                                                                                                                  | <p>[ ]</p>                                            |
| <p>M11. ລະບົບດັ່ງກ່າວໄດ້ບັນທຶກຂໍ້ມູນກ່ຽວກັບຄົນເຈັບແຕ່ລະຄົນບໍ່ (1 ແຖວໃນການລົງທະບຽນ = ຄົນເຈັບ1ຄົນ)?</p> <p>1 = ແມ່ນ</p> <p>0 = ບໍ່ແມ່ນ</p> <p>8 = ບໍ່ຮູ້</p>                                                                                                                                                                                                                                                               | <p>[ ]</p>                                            |
| <p>M12. ລະບົບດັ່ງກ່າວໄດ້ຮັກສາການຈົດບັນຊີ ຫຼື ການນັບຈຳນວນຂອງຄົນເຈັບທີ່ໄດ້ຮັບການກວດກາເຊື້ອໄຂ້ມາເລເລຍ ຫຼື ການປິ່ນປົວພະຍາດໄຂ້ມາເລເລຍ ເປັນເວລາທີ່ແນ່ນອນ ເຊັ່ນຕໍ່ມື້, ຕໍ່ອາທິດ, ຫຼື ຕໍ່ເດືອນ ບໍ່?</p> <p>1 = ແມ່ນ</p> <p>8 = ບໍ່ຮູ້</p> <p>0 = ບໍ່ແມ່ນ</p>                                                                                                                                                                     | <p>[ ]</p>                                            |
| <p>M13. ຂໍ້ມູນຈຳນວນຂອງຄົນເຈັບທີ່ໄດ້ຮັບການປິ່ນປົວ ຫຼື ການກວດຫາເຊື້ອໄຂ້ມາເລເລຍ ແມ່ນໄດ້ຖືກລາຍງານໃຫ້ແກ່ອົງການຈັດຕັ້ງໃດໜຶ່ງຂອງລັດ ຫຼື ອົງການຈັດຕັ້ງທີ່ບໍ່ຂຶ້ນກັບລັດຖະບານບໍ່?</p> <p>1 = ແມ່ນ</p> <p>0 = ບໍ່ແມ່ນ <b>ໄປຂໍ້ P10</b></p> <p>8 = ບໍ່ຮູ້ <b>ໄປຂໍ້ P10</b></p>                                                                                                                                                       | <p>[ ]</p>                                            |

|                                                                                                                                                                                                              |   |
|--------------------------------------------------------------------------------------------------------------------------------------------------------------------------------------------------------------|---|
| M14. ຂໍ້ມູນຈຳນວນຂອງຄົນເຈັບທີ່ໄດ້ຮັບ ການກວດຫາເຊື້ອໄຂ້ມາເລເລຍ ທີ່ໄດ້ຮັບການປິ່ນປົວ ແມ່ນໄດ້ຖືກລາຍງານໃຫ້ແກ່ອົງການຈັດຕັ້ງ ຫຼືພາກສ່ວນໃດ?<br><b>ບໍ່ຕ້ອງອ່ານບັນຊີລາຍຊື່ ແລະ ຂີດວົງອ້ອມເອົາທັງໝົດທີ່ຜູ້ຕອບກ່າວເຖິງ</b> |   |
| I. ສູນໄຂ້ຍຸງ, ແມງໄມ້ ແລະ ແມ່ກາຝາກ                                                                                                                                                                            | A |
| II. ແຂວງ (ລວມທັງ ໂຮງໝໍແຂວງ)                                                                                                                                                                                  | B |
| III. ເມືອງ (ລວມທັງໂຮງໝໍເມືອງ)                                                                                                                                                                                | C |
| IV.ອື່ນໆ, ລະບຸ [ ]                                                                                                                                                                                           | X |

|                                                                                                                                                                           |     |
|---------------------------------------------------------------------------------------------------------------------------------------------------------------------------|-----|
| M15. ໄດ້ມີການລາຍງານຈຳນວນຂອງຄົນເຈັບທີ່ໄດ້ຮັບການປິ່ນປົວ ຫຼື ການກວດພະຍາດໄຂ້ມາເລເລຍ ເລື້ອຍປານໃດ?<br><br>1 = ໜຶ່ງຄັ້ງຕໍ່ເດືອນ<br>2 = ໜຶ່ງຄັ້ງຕໍ່ 3 ເດືອນ<br>3 = ອື່ນໆ, ລະບຸ[ ] | [ ] |
|---------------------------------------------------------------------------------------------------------------------------------------------------------------------------|-----|

|                                                                                                                                                               |     |
|---------------------------------------------------------------------------------------------------------------------------------------------------------------|-----|
| M16. ທ່ານມີວິທີການແນວໃດໃນການແບ່ງປັນຂໍ້ມູນຄົນເຈັບກັບອົງການຈັດຕັ້ງເຫຼົ່ານີ້?<br><b>ອ່ານບັນຊີລາຍຊື່ ແລະ ບັນທຶກ 1 ສຳລັບ ແມ່ນ, 0 ສຳລັບ ບໍ່ແມ່ນ, 8 ສຳລັບ ບໍ່ຮູ້</b> |     |
| I. ໂດຍເຈ້ຍແບບຟອມ/ບັນທຶກ                                                                                                                                       | [ ] |
| II. ໂດຍທາງໂທລະສັບ-ຂໍ້ຄວາມຜ່ານມືຖື                                                                                                                             | [ ] |
| III. ໂດຍທາງໂທລະສັບ ແບບຟອມອີເລັກໂທນິກ                                                                                                                          | [ ] |
| IV. ໂດຍທາງໂທລະເລກ (ແຟັກ)                                                                                                                                      | [ ] |
| V. ໂດຍທາງໂທລະສັບ-ລາຍງານປາກເປົ່າ                                                                                                                               | [ ] |
| VI.ດ້ວຍຕົວເອງ - ລາຍງານດ້ວຍປາກເປົ່າ                                                                                                                            | [ ] |
| VII. ໂດຍຄອມພິວເຕີ້-ແບບຟອມອີເລັກໂທນິກ                                                                                                                          | [ ] |

**ນັກສຳພາດ:** ສຳລັບຄຳຖາມຕໍ່ໄປນີ້ບັນທຶກຊື່ຍີ່ຫໍ້, ຊື່ຕົວຢ່າຂອງຢາປິ່ນປົວໄຂ້ມາເລເລຍ , ແລະ ຮູບແບບຂອງຢາ, ໃນບ່ອນວ່າງທີ່ຈັດກຽມໄວ້. ຂໍໃຫ້ຜູ້ບໍລິການເອົາຢາໃຫ້ທ່ານເບິ່ງ ຖ້າວ່າມັນມີຢູ່ໃນຮ້ານເພື່ອຍືນຍັນຄວາມຖືກຕ້ອງຂອງຊື່ ແລະ ຮູບແບບຂອງຢາ.

P10. ໃນຄວາມຄິດຂອງທ່ານ, ສຳລັບການປິ່ນປົວໄຂ້ມາເລເລຍທີ່ບໍ່ມີອາການສົນໃນຜູ້ໃຫຍ່, ແມ່ນຫຍັງທີ່ເປັນການປິ່ນປົວທີ່ໄດ້ຜົນທີ່ສຸດ? ຂໍໃຫ້ຜູ້ບໍລິການເອົາຢາໃຫ້ທ່ານເບິ່ງຖ້າວ່າມັນມີຢູ່ໃນຮ້ານ.

|                                                             |                                                                                                                                                                                                                                                                                                                       |
|-------------------------------------------------------------|-----------------------------------------------------------------------------------------------------------------------------------------------------------------------------------------------------------------------------------------------------------------------------------------------------------------------|
| ຊື່ຍີ່ຫໍ້ ຫຼື ຊື່ຕົວຢ່າ<br><br><br>[ _____ ]<br>ບໍ່ຮູ້ = 98 | ຮູບແບບຢາ/ສູດສະແດງ<br>01 = ຢາເມັດ                      04 = ຢານ້ຳເຊື່ອມ                      07 = ຢາຢອດ<br>02 = ຢາຍັດ                      05 = ຢານ້ຳແຂວນຕະກອນ                      95 = ບໍ່ໄດ້ລະບຸ<br>03 = ຢາຝຸ່ນເປັນຊອງ                      06 = ຢາສັກ (ນ້ຳຫຼືຝຸ່ນ)                      98 = ບໍ່ຮູ້<br><br>[     ] |
|-------------------------------------------------------------|-----------------------------------------------------------------------------------------------------------------------------------------------------------------------------------------------------------------------------------------------------------------------------------------------------------------------|

|                                                             |                                                                                                                                                                                                                                                                                                                       |
|-------------------------------------------------------------|-----------------------------------------------------------------------------------------------------------------------------------------------------------------------------------------------------------------------------------------------------------------------------------------------------------------------|
| ຊື່ຍີ່ຫໍ້ ຫຼື ຊື່ຕົວຢ່າ<br><br><br>[ _____ ]<br>ບໍ່ຮູ້ = 98 | ຮູບແບບຢາ/ສູດສະແດງ<br>01 = ຢາເມັດ                      04 = ຢານ້ຳເຊື່ອມ                      07 = ຢາຢອດ<br>02 = ຢາຍັດ                      05 = ຢານ້ຳແຂວນຕະກອນ                      95 = ບໍ່ໄດ້ລະບຸ<br>03 = ຢາຝຸ່ນເປັນຊອງ                      06 = ຢາສັກ (ນ້ຳຫຼືຝຸ່ນ)                      98 = ບໍ່ຮູ້<br><br>[     ] |
|-------------------------------------------------------------|-----------------------------------------------------------------------------------------------------------------------------------------------------------------------------------------------------------------------------------------------------------------------------------------------------------------------|

|                                                             |                                                                                                                                                                                                                                                                                                                       |
|-------------------------------------------------------------|-----------------------------------------------------------------------------------------------------------------------------------------------------------------------------------------------------------------------------------------------------------------------------------------------------------------------|
| ຊື່ຍີ່ຫໍ້ ຫຼື ຊື່ຕົວຢ່າ<br><br><br>[ _____ ]<br>ບໍ່ຮູ້ = 98 | ຮູບແບບຢາ/ສູດສະແດງ<br>01 = ຢາເມັດ                      04 = ຢານ້ຳເຊື່ອມ                      07 = ຢາຢອດ<br>02 = ຢາຍັດ                      05 = ຢານ້ຳແຂວນຕະກອນ                      95 = ບໍ່ໄດ້ລະບຸ<br>03 = ຢາຝຸ່ນເປັນຊອງ                      06 = ຢາສັກ (ນ້ຳຫຼືຝຸ່ນ)                      98 = ບໍ່ຮູ້<br><br>[     ] |
|-------------------------------------------------------------|-----------------------------------------------------------------------------------------------------------------------------------------------------------------------------------------------------------------------------------------------------------------------------------------------------------------------|

P13. ການປິ່ນປົວໄຂ້ມາເລເລຍ ທີ່ບໍ່ມີອາການສົນໃນຜູ້ໃຫຍ່ແບບໃດ ທີ່ສ່ວນໃຫຍ່ທ່ານມັກຈະແນະນຳໃຫ້ແກ່ລູກຄ້າ?

ຖາມຜູ້ໃຫຍ່ບໍລິການເອົາຢາໃຫ້ເບິ່ງ ຖ້າວ່າມີຢູ່ໃນຮ້ານ

|                                                     |                                                                                                                                                                                                                                                                                                        |
|-----------------------------------------------------|--------------------------------------------------------------------------------------------------------------------------------------------------------------------------------------------------------------------------------------------------------------------------------------------------------|
| ຊື່ຄູ່ຄ້າ ຫຼື ຊື່ຕົວຢ່າ<br><br>_____<br>ບໍ່ຮູ້ = 98 | ຮູບແບບຢາ/ສູດສະແດງ<br>01 = ຢາເມັດ                      04 = ຢານ້ຳເຊື່ອມ                      07 = ຢາຢອດ<br>02 = ຢາຍັດ                      05 = ຢານ້ຳແຂວນຕະກອນ                      95 = ບໍ່ໄດ້ລະບຸ<br>03 = ຢາຝຸ່ນເປັນຊອງ                      06 = ຢາສັກ (ນ້ຳຫຼືຝຸ່ນ)                      98 = ບໍ່ຮູ້ |
|                                                     | [ ] [ ]                                                                                                                                                                                                                                                                                                |

|                                                     |                                                                                                                                                                                                                                                                                                        |
|-----------------------------------------------------|--------------------------------------------------------------------------------------------------------------------------------------------------------------------------------------------------------------------------------------------------------------------------------------------------------|
| ຊື່ຄູ່ຄ້າ ຫຼື ຊື່ຕົວຢ່າ<br><br>_____<br>ບໍ່ຮູ້ = 98 | ຮູບແບບຢາ/ສູດສະແດງ<br>01 = ຢາເມັດ                      04 = ຢານ້ຳເຊື່ອມ                      07 = ຢາຢອດ<br>02 = ຢາຍັດ                      05 = ຢານ້ຳແຂວນຕະກອນ                      95 = ບໍ່ໄດ້ລະບຸ<br>03 = ຢາຝຸ່ນເປັນຊອງ                      06 = ຢາສັກ (ນ້ຳຫຼືຝຸ່ນ)                      98 = ບໍ່ຮູ້ |
|                                                     | [ ] [ ]                                                                                                                                                                                                                                                                                                |

|                                                     |                                                                                                                                                                                                                                                                                                        |
|-----------------------------------------------------|--------------------------------------------------------------------------------------------------------------------------------------------------------------------------------------------------------------------------------------------------------------------------------------------------------|
| ຊື່ຄູ່ຄ້າ ຫຼື ຊື່ຕົວຢ່າ<br><br>_____<br>ບໍ່ຮູ້ = 98 | ຮູບແບບຢາ/ສູດສະແດງ<br>01 = ຢາເມັດ                      04 = ຢານ້ຳເຊື່ອມ                      07 = ຢາຢອດ<br>02 = ຢາຍັດ                      05 = ຢານ້ຳແຂວນຕະກອນ                      95 = ບໍ່ໄດ້ລະບຸ<br>03 = ຢາຝຸ່ນເປັນຊອງ                      06 = ຢາສັກ (ນ້ຳຫຼືຝຸ່ນ)                      98 = ບໍ່ຮູ້ |
|                                                     | [ ] [ ]                                                                                                                                                                                                                                                                                                |

|                                                     |                                                                                                                                                                                                                                                                                                        |
|-----------------------------------------------------|--------------------------------------------------------------------------------------------------------------------------------------------------------------------------------------------------------------------------------------------------------------------------------------------------------|
| ຊື່ຄູ່ຄ້າ ຫຼື ຊື່ຕົວຢ່າ<br><br>_____<br>ບໍ່ຮູ້ = 98 | ຮູບແບບຢາ/ສູດສະແດງ<br>01 = ຢາເມັດ                      04 = ຢານ້ຳເຊື່ອມ                      07 = ຢາຢອດ<br>02 = ຢາຍັດ                      05 = ຢານ້ຳແຂວນຕະກອນ                      95 = ບໍ່ໄດ້ລະບຸ<br>03 = ຢາຝຸ່ນເປັນຊອງ                      06 = ຢາສັກ (ນ້ຳຫຼືຝຸ່ນ)                      98 = ບໍ່ຮູ້ |
|                                                     | [ ] [ ]                                                                                                                                                                                                                                                                                                |

|                                                                                                                                                                                                                                    |   |
|------------------------------------------------------------------------------------------------------------------------------------------------------------------------------------------------------------------------------------|---|
| P16. ກະລຸນາບອກຊື່ການປິ່ນປົວຂັ້ນທຳອິດ ທີ່ແນະນຳໂດຍລັດຖະບານ ໃນການປິ່ນປົວພະຍາດໄຂ້ມາເລເລຍ ພາດຊະໂມດຽມ ຟາຊີພາລອມ (Pf) ທີ່ຍັງບໍ່ມີອາການສົນ ສຳລັບຜູ້ໃຫຍ່ (60kg).<br><b>ບໍ່ຕ້ອງອ່ານບັນຊີລາຍຊື່ ແລະ ຂີດວົງອ້ອມເອົາທັງໝົດທີ່ຜູ້ຕອບກ່າວເຖິງ</b> |   |
| ອາເຕເມເທີ ລູມີແຟນທິນ (ຄອດເທີມ, ຄອມບຽດ, ອາເຕຟານ)<br>Artemether Lumefantrine (Coartem, Combiart, Artefan)                                                                                                                            | A |
| ພຣີມາກິນ (Primaquine)                                                                                                                                                                                                              | B |
| ອື່ນໆ ລະບຸ [ ]                                                                                                                                                                                                                     | X |
| ບໍ່ຮູ້                                                                                                                                                                                                                             | Z |

**ຄຳແນະນຳສຳລັບການຂ້າມ**  
 ຖ້າວ່າ ອາເຕເມເທີ ລູມີແຟນທິນ Artemether Lumefantrine ຖືກຂີດອ້ອມເອົາ >>> ໄປຕໍ່ຂໍ້ P17a  
 ຖ້າວ່າ ອາເຕເມເທີ ລູມີແຟນທິນ Artemether Lumefantrine ບໍ່ຖືກຂີດອ້ອມເອົາ >>> ໄປຕໍ່ຂໍ້ P20a

|                                                                                                                                                                                                                                                                                                                                                                                                                                                                                                                                                                                                                                                                                                                                                                                                                                                                                                                                                                                                                                                                                                   |                                                                                                                  |
|---------------------------------------------------------------------------------------------------------------------------------------------------------------------------------------------------------------------------------------------------------------------------------------------------------------------------------------------------------------------------------------------------------------------------------------------------------------------------------------------------------------------------------------------------------------------------------------------------------------------------------------------------------------------------------------------------------------------------------------------------------------------------------------------------------------------------------------------------------------------------------------------------------------------------------------------------------------------------------------------------------------------------------------------------------------------------------------------------|------------------------------------------------------------------------------------------------------------------|
| P17a. ກະລຸນາອະທິບາຍລະບົບການປິ່ນປົວທີ່ແນະນຳໂດຍລັດຖະບານສຳລັບ ອາເຕເມເທີ ລູມີແຟນທິນ (Artemether Lumefantrine) ເພື່ອການປິ່ນປົວພະຍາດໄຂ້ມາເລເລຍ ພາດຊະໂມດຽມ ຟາຊີພາລອມ (Pf) ທີ່ຍັງບໍ່ມີອາການສົນ ໃນຜູ້ໃຫຍ່ (60kg).<br><br><b>ຖ້າວ່າຜູ້ໃຫ້ບໍລິການມີຢາຢູ່, ນຳໃຊ້ທີ່ຢາເພື່ອຕື່ມລາຍລະອຽດຂອງຢາ</b><br><b>ຖ້າບໍ່ມີຢາ, ຂໍໃຫ້ຜູ້ໃຫ້ບໍລິການລະບຸຢາດັ່ງກ່າວຈາກບັດສະແດງ</b><br><b>ຖ້າ ຍັງບໍ່ສາມາດລະບຸໄດ້, ຂໍໃຫ້ຜູ້ໃຫ້ບໍລິການຄິດຄົ້ນກ່ຽວກັບລາຍລະອຽດຂອງຢາ</b><br><br>i. ຄວາມແຮງຂອງ ອາເຕເມເທີ (Artemether) ແມ່ນເທົ່າໃດ?<br><br>ii. ຄວາມແຮງຂອງ ລູມີແຟນທິນ (Lumefantrine) ແມ່ນເທົ່າໃດ?<br><br><br><b>ອ່ານ 3 ຄຳຖາມຕໍ່ໄປນີ້ໃຫ້ຜູ້ໃຫ້ບໍລິການຟັງ (ບໍ່ບັນທຶກຂໍ້ມູນນີ້ຈາກທີ່ຢາ).</b><br><br><br>iv. ເຂົາເຈົ້າຄວນກິນ ອາເຕເມເທີ ລູມີແຟນທິນ (ຄອດເທີມ, ຄອມບຽດ, ອາເຕຟານ) - Artemether Lumefantrine (Coartem, Combiart, Artefan) ຈັກເມັດໃນຄັ້ງໜຶ່ງ?<br><br>v. ຄວນກິນຢາ ອາເຕເມເທີ ລູມີແຟນທິນ (ຄອດເທີມ, ຄອມບຽດ, ອາເຕຟານ) - Artemether Lumefantrine (Coartem, Combiart, Artefan) ຈັກເທື່ອຕໍ່ມື້?<br><br>vi. ຄວນກິນຢາ ອາເຕເມເທີ ລູມີແຟນທິນ (ຄອດເທີມ, ຄອມບຽດ, ອາເຕຟານ) - Artemether Lumefantrine (Coartem, Combiart, Artefan) ເປັນເວລາຈັກມື້? | [ ]-[ ]-[ ]mg<br><br>[ ]-[ ]-[ ]mg<br>ບໍ່ຮູ້ = 999.8<br><br><br>[ ]-[ ]-[ ]<br><br>[ ]<br><br>[ ]<br>ບໍ່ຮູ້ = 98 |
|---------------------------------------------------------------------------------------------------------------------------------------------------------------------------------------------------------------------------------------------------------------------------------------------------------------------------------------------------------------------------------------------------------------------------------------------------------------------------------------------------------------------------------------------------------------------------------------------------------------------------------------------------------------------------------------------------------------------------------------------------------------------------------------------------------------------------------------------------------------------------------------------------------------------------------------------------------------------------------------------------------------------------------------------------------------------------------------------------|------------------------------------------------------------------------------------------------------------------|

|                                                                                                                                                                                                                                                                        |   |
|------------------------------------------------------------------------------------------------------------------------------------------------------------------------------------------------------------------------------------------------------------------------|---|
| P18. ກະລຸນາບອກຊື່ຢາທີ່ເປັນຕົວເລືອກຂັ້ນທຳອິດ ທີ່ແນະນຳໂດຍລັດຖະບານໃນການປິ່ນປົວພະຍາດໄຂ້ມາເລເລຍ ທີ່ບໍ່ມີອາການສົນ ພາດຊະໂມດຽມ ວີວັກ ( <i>Plasmodium vivax</i> ) ທີ່ບໍ່ມີອາການສົນ ໃນຜູ້ໃຫຍ່ (60kg).<br><b>ບໍ່ຕ້ອງອ່ານບັນຊີລາຍຊື່ ແລະ ຂີດວົງອ້ອມເອົາທັງໝົດທີ່ຜູ້ຕອບກ່າວເຖິງ</b> |   |
| ອາເຕເມເທີ ລູມີແຟນທິນ (ຄອດເທີມ, ຄອມບຽດ, ອາເຕຟານ)<br>Artemether Lumefantrine (Coartem, Combiart, Artefan)                                                                                                                                                                | A |
| ພຣີມາກິນ (Primaquine)                                                                                                                                                                                                                                                  | B |
| ອື່ນໆລະບຸ [_____]                                                                                                                                                                                                                                                      | X |
| ບໍ່ຮູ້                                                                                                                                                                                                                                                                 | Z |

**ຄຳແນະນຳສຳລັບການຂ້າມ**  
 ຖ້າວ່າ ອາເຕເມເທີ ລູມີແຟນທິນ Artemether Lumefantrine ຖືກຂີດອ້ອມເອົາ >>> ໄປຕໍ່ຂໍ້ P19a  
 ຖ້າວ່າ ອາເຕເມເທີ ລູມີແຟນທິນ Artemether Lumefantrine ແລະ Primaquine ທັງສອງແມ່ນບໍ່ຖືກຂີດອ້ອມເອົາ >>> ໄປຕໍ່ຂໍ້ P20a  
 ຖ້າວ່າມີແຕ່ ພຣີມາກິນ Primaquine ຖືກຂີດອ້ອມເອົາ >>> ໄປຕໍ່ຂໍ້ P20b

|                                                                                                                                                                                                                                                                                                                                                                                                                                                                                                                                                                                                                                                                                                                                                                                                                                                                                                                                                                                                                                                                                        |                                                                                                          |
|----------------------------------------------------------------------------------------------------------------------------------------------------------------------------------------------------------------------------------------------------------------------------------------------------------------------------------------------------------------------------------------------------------------------------------------------------------------------------------------------------------------------------------------------------------------------------------------------------------------------------------------------------------------------------------------------------------------------------------------------------------------------------------------------------------------------------------------------------------------------------------------------------------------------------------------------------------------------------------------------------------------------------------------------------------------------------------------|----------------------------------------------------------------------------------------------------------|
| P19a. ກະລຸນາອະທິບາຍລະບົບການປິ່ນປົວທີ່ແນະນຳໂດຍລັດຖະບານສຳລັບ ອາເຕເມເທີ ລູມີແຟນທິນ (Artemether Lumefantrine) ເພື່ອການປິ່ນປົວພະຍາດໄຂ້ມາເລເລຍ ພາດຊະໂມດຽມ ວີວັກ (Pv) ທີ່ຍັງບໍ່ມີອາການສົນ ໃນຜູ້ໃຫຍ່ (60kg).<br><br><b>ຖ້າວ່າຜູ້ໃຫ້ບໍລິການມີຢາຢູ່, ນຳໃຊ້ທີ່ຢາເພື່ອຕື່ມລາຍລະອຽດຂອງຢາ.</b><br><b>ຖ້າບໍ່ມີຢາ, ຂໍໃຫ້ຜູ້ໃຫ້ບໍລິການລະບຸຢາດັ່ງກ່າວຈາກບັດສະແດງ</b><br><b>ຖ້າ ຍັງບໍ່ສາມາດລະບຸໄດ້, ຂໍໃຫ້ຜູ້ໃຫ້ບໍລິການຄິດຄົ້ນກ່ຽວກັບລາຍລະອຽດຂອງຢາ</b><br><br>i. ຄວາມແຮງຂອງ ອາເຕເມເທີ (Artemether) ແມ່ນເທົ່າໃດ?<br><br>ii. ຄວາມແຮງຂອງ ລູມີແຟນທິນ (Lumefantrine) ແມ່ນເທົ່າໃດ?<br><br><b>ອ່ານ 3 ຄຳຖາມຕໍ່ໄປນີ້ໃຫ້ຜູ້ໃຫ້ບໍລິການຟັງ (ບໍ່ບັນທຶກຂໍ້ມູນນີ້ຈາກທີ່ຢາ).</b><br><br>iv. ເຂົາເຈົ້າຄວນກິນ ອາເຕເມເທີ ລູມີແຟນທິນ (ຄອດເທີມ, ຄອມບຽດ, ອາເຕຟານ) - Artemether Lumefantrine (Coartem, Combiart, Artefan) ຈັກເມັດໃນຄັ້ງໜຶ່ງ?<br><br>v. ຄວນກິນຢາ ອາເຕເມເທີ ລູມີແຟນທິນ (ຄອດເທີມ, ຄອມບຽດ, ອາເຕຟານ) - Artemether Lumefantrine (Coartem, Combiart, Artefan) ຈັກເທື່ອຕໍ່ມື້?<br><br>vi. ຄວນກິນຢາ ອາເຕເມເທີ ລູມີແຟນທິນ (ຄອດເທີມ, ຄອມບຽດ, ອາເຕຟານ) - Artemether Lumefantrine (Coartem, Combiart, Artefan) ເປັນເວລາຈັກມື້? | [ ]-[ ]-[ ]mg<br>[ ]-[ ]-[ ]mg<br>ບໍ່ຮູ້ = 999.8<br><br>[ ]-[ ]-[ ]<br>[ ]-[ ]<br>[ ]-[ ]<br>ບໍ່ຮູ້ = 98 |
|----------------------------------------------------------------------------------------------------------------------------------------------------------------------------------------------------------------------------------------------------------------------------------------------------------------------------------------------------------------------------------------------------------------------------------------------------------------------------------------------------------------------------------------------------------------------------------------------------------------------------------------------------------------------------------------------------------------------------------------------------------------------------------------------------------------------------------------------------------------------------------------------------------------------------------------------------------------------------------------------------------------------------------------------------------------------------------------|----------------------------------------------------------------------------------------------------------|

**ຄຳແນະນຳສຳລັບການຂ້າມ**  
 ຖ້າວ່າ ພຣີມາກິນ Primaquine ຖືກຂີດອ້ອມເອົາ ໃນ P18 >>> ໄປຕໍ່ຂໍ້ P19b  
 ຖ້າວ່າ ພຣີມາກິນ Primaquine ບໍ່ຖືກຂີດອ້ອມເອົາ ໃນ P18 >>> ໄປຕໍ່ຂໍ້ P20a

|                                                                                                                                                                                                                                                                                                                                                                                                                                                                                                                                                                                                                                                                                                                                             |                                                                                                                        |
|---------------------------------------------------------------------------------------------------------------------------------------------------------------------------------------------------------------------------------------------------------------------------------------------------------------------------------------------------------------------------------------------------------------------------------------------------------------------------------------------------------------------------------------------------------------------------------------------------------------------------------------------------------------------------------------------------------------------------------------------|------------------------------------------------------------------------------------------------------------------------|
| <p>P19b. ກະລຸນາອະທິບາຍລະບົບການປິ່ນປົວທີ່ແນະນຳໂດຍລັດຖະບານສຳລັບ ພິຣມາກິນ (Primaquine) ເພື່ອການປິ່ນປົວພະຍາດໄຂ້ມາເລເລຍ ພາດຊະໂມດຽມ ວີວັກ (Pv) ທີ່ຍັງບໍ່ມີອາການສົນ ໃນຜູ້ໃຫຍ່ (60kg).</p> <p><b>ຖ້າວ່າຜູ້ໃຫ້ບໍລິການມີຢາຢູ່, ນຳໃຊ້ທີ່ຢາເພື່ອຕົ້ມລາຍລະອຽດຂອງຢາ.</b></p> <p><b>ຖ້າບໍ່ມີຢາ, ຂໍໃຫ້ຜູ້ໃຫ້ບໍລິການລະບຸຢາດັ່ງກ່າວຈາກບັດສະແດງ</b></p> <p><b>ຖ້າ ຍັງບໍ່ສາມາດລະບຸໄດ້, ຂໍໃຫ້ຜູ້ໃຫ້ບໍລິການຄິດຄົ້ນກ່ຽວກັບລາຍລະອຽດຂອງຢາ</b></p> <p>i. ຄວາມແຮງຂອງ ພິຣມາກິນ (Primaquine) ແມ່ນເທົ່າໃດ?</p> <p>ອ່ານ 3 ຄຳຖາມຕໍ່ໄປນີ້ໃຫ້ຜູ້ໃຫ້ບໍລິການຟັງ (ບໍ່ບັນທຶກຂໍ້ມູນນີ້ຈາກທ່ານຢາ).</p> <p>iii. ຄວນກິນ ພິຣມາກິນ (Primaquine) ຈັກເມັດໃນຄັ້ງໜຶ່ງ?</p> <p>iv. ຄວນກິນຢາ ພິຣມາກິນ (Primaquine) ຈັກເທື່ອຕໍ່ມື້?</p> <p>v. ຄວນກິນ ພິຣມາກິນ (Primaquine) ເປັນເວລາຈັກມື້?</p> | <p>[ ]-[ ]-[ ]-[ ]mg</p> <p>ບໍ່ຮູ້ = 999.8</p> <p>[ ]-[ ]-[ ]-[ ]</p> <p>[ ]-[ ]</p> <p>[ ]-[ ]</p> <p>ບໍ່ຮູ້ = 98</p> |
| <p><b>ຄຳແນະນຳສຳລັບການຂ້າມ</b></p> <p><b>ໄປຕໍ່ທີ່ຂີ້ P20b</b></p>                                                                                                                                                                                                                                                                                                                                                                                                                                                                                                                                                                                                                                                                            |                                                                                                                        |

|                                                                                                                                                                                                                                                                                                                                                                                                                      |                                     |
|----------------------------------------------------------------------------------------------------------------------------------------------------------------------------------------------------------------------------------------------------------------------------------------------------------------------------------------------------------------------------------------------------------------------|-------------------------------------|
| <p>P20a. ທ່ານເຄີຍເຫັນ ຫຼື ໄດ້ຍິນກ່ຽວກັບຢາທີ່ຮ້ອງວ່າ ພິຣມາກິນ primaquine ມາກ່ອນບໍ່?</p> <p>1 = ແມ່ນ <b>ໄປທີ່ຂີ້ P20b</b></p> <p>0 = ບໍ່ແມ່ນ <b>ໄປທີ່ຂີ້ P21</b></p> <p>8 = ບໍ່ຮູ້ <b>ໄປທີ່ຂີ້ P21</b></p>                                                                                                                                                                                                             | <p>[ ]</p>                          |
| <p>P20b. ຢາພິຣມາກິນ primaquine ແມ່ນຖືກນຳໃຊ້ເພື່ອຫຍັງ?</p> <p><b>ບໍ່ຕ້ອງອ່ານບັນຊີລາຍຊື່ ແລະ ຂີດວົງອ້ອມເອົາທັງໝົດທີ່ຜູ້ຕອບກ່າວເຖິງ</b></p> <p>ໃຊ້ເປັນຢາປິ່ນປົວພະຍາດໄຂ້ມາເລເລຍ / ເພື່ອປິ່ນປົວໄຂ້ມາເລເລຍ</p> <p>ໃຊ້ເປັນຢາຂ້າເຊື້ອ ກາມີໂຕຊາຍ / ເພື່ອປ້ອງກັນການສົ່ງຕໍ່ຂອງເຊື້ອໄຂ້ມາເລເລຍ</p> <p>ໃຊ້ເປັນການປິ່ນປົວໄຂ້ມາເລເລຍ ພາດຊະໂມດຽມ ວີວັກ (Pv) / ເພື່ອປ້ອງກັນການກັບມາເປັນຄືນຂອງ ພາດຊະໂມດຽມ ວີວັກ (Pv)</p> <p>ບໍ່ຮູ້</p> | <p>A</p> <p>B</p> <p>C</p> <p>Z</p> |
| <p>P20c. ທ່ານເຄີຍໄດ້ຂຽນໃບສັງຢາ ພິຣມາກິນ primaquine ໃຫ້ຄົນເຈັບ/ລູກຄ້າບໍ່?</p> <p>1 = ແມ່ນ</p> <p>0 = ບໍ່ແມ່ນ</p>                                                                                                                                                                                                                                                                                                      | <p>[ ]</p>                          |
| <p>P20d. ທ່ານເຄີຍໃຫ້ບໍລິການ ຫຼື ຂາຍຢາ ພິຣມາກິນ primaquine ໃຫ້ແກ່ຄົນເຈັບ/ລູກຄ້າບໍ່?</p> <p>1 = ແມ່ນ</p> <p>0 = ບໍ່ແມ່ນ</p>                                                                                                                                                                                                                                                                                            | <p>[ ]</p>                          |

|                                                                                                                                                                                                                                                                                                                                                                                                                                                                                                                                                                                                                                                                                                                                                                                                                                                                                                                                                                                                                                                                                                                                                                                                                                                                                                                                     |                                               |   |                                            |   |                              |   |                             |   |                                |   |                               |   |                                     |   |                |   |  |
|-------------------------------------------------------------------------------------------------------------------------------------------------------------------------------------------------------------------------------------------------------------------------------------------------------------------------------------------------------------------------------------------------------------------------------------------------------------------------------------------------------------------------------------------------------------------------------------------------------------------------------------------------------------------------------------------------------------------------------------------------------------------------------------------------------------------------------------------------------------------------------------------------------------------------------------------------------------------------------------------------------------------------------------------------------------------------------------------------------------------------------------------------------------------------------------------------------------------------------------------------------------------------------------------------------------------------------------|-----------------------------------------------|---|--------------------------------------------|---|------------------------------|---|-----------------------------|---|--------------------------------|---|-------------------------------|---|-------------------------------------|---|----------------|---|--|
| <p>P21. ການກວດບົ່ງມະຕິພະຍາດໄຂ້ມາເລເລຍ ແບບຮູ້ຜົນວ່ອງໄວ, ຫຼື ເອີ້ນວ່າ ກວດສອບດ້ວຍເຈ້ຍຈຸ່ມບົ່ງມະຕິແບບວ່ອງໄວ, ມັນມີຂະໜາດນ້ອຍ ແລະ ມາເປັນຊ່ອງຂອງໃຜຂອງມັນທີ່ສາມາດບົ່ງມະຕິແບບວ່ອງໄວວ່າຄົນຜູ້ນັ້ນມີເຊື້ອໄຂ້ມາເລເລຍ ຫຼືບໍ່, ເອົາບັດສະແດງຮູບພາບເຄື່ອງກວດໃຫ້ຜູ້ຕອບເບິ່ງ</p> <p>ທ່ານເຄີຍເຫັນ ຫຼື ໄດ້ຍິນກ່ຽວກັບ ເຈ້ຍຈຸ່ມບົ່ງມະຕິແບບວ່ອງໄວກວດຫາເຊື້ອໄຂ້ມາເລເລຍບໍ່?</p> <p>1 = ແມ່ນ <b>ໄປຂໍ້ P22</b><br/>                 0 = ບໍ່ແມ່ນ <b>ໄປພາກທີ 6</b><br/>                 8 = ບໍ່ຮູ້ <b>ໄປພາກທີ 6</b></p>                                                                                                                                                                                                                                                                                                                                                                                                                                                                                                                                                                                                                                                                                                                                                                                                                                          | <p>[ ]</p>                                    |   |                                            |   |                              |   |                             |   |                                |   |                               |   |                                     |   |                |   |  |
| <p>P22. ທ່ານເຄີຍໄດ້ກວດໄຂ້ມາເລເລຍໃຫ້ລູກຄ້າໂດຍໃຊ້ເຈ້ຍຈຸ່ມບົ່ງມະຕິແບບວ່ອງໄວບໍ່?</p> <p>1 = ແມ່ນ<br/>                 0 = ບໍ່ແມ່ນ<br/>                 8 = ບໍ່ຮູ້</p>                                                                                                                                                                                                                                                                                                                                                                                                                                                                                                                                                                                                                                                                                                                                                                                                                                                                                                                                                                                                                                                                                                                                                                   | <p>[ ]</p>                                    |   |                                            |   |                              |   |                             |   |                                |   |                               |   |                                     |   |                |   |  |
| <p>P23. ທ່ານຈະແນະນຳໃຫ້ຄົນເຈັບ/ລູກຄ້າກິນຢາປິ່ນປົວໄຂ້ມາເລເລຍບໍ່ ຖ້າຜົນກວດເລືອດຊອກຫາເຊື້ອມາເລເລຍ ໂດຍໃຊ້ເຈ້ຍຈຸ່ມບົ່ງມະຕິແບບວ່ອງໄວບໍ່ພົບເຊື້ອ (ໃຫ້ຜົນລົບ)?</p> <p>ອ່ານບັນຊີລາຍຊື່. <b>ບັນທຶກພຽງຄຳຕອບດຽວ</b></p> <p>1 = ແມ່ນ, ບາງເທື່ອ<br/>                 2 = ແມ່ນ, ຕະຫຼອດ<br/>                 3 = ບໍ່, ບໍ່ເຄີຍ <b>ໄປພາກທີ 6</b><br/>                 8 = ບໍ່ຮູ້ <b>ໄປພາກທີ 6</b></p>                                                                                                                                                                                                                                                                                                                                                                                                                                                                                                                                                                                                                                                                                                                                                                                                                                                                                                                                                  | <p>[ ]</p>                                    |   |                                            |   |                              |   |                             |   |                                |   |                               |   |                                     |   |                |   |  |
| <p>P24. ໃນກໍລະນີໃດທ່ານຈະແນະນຳໃຫ້ຄົນເຈັບ/ລູກຄ້າກິນຢາປິ່ນປົວໄຂ້ມາເລເລຍ ຖ້າຜົນກວດເລືອດຊອກຫາ ເຊື້ອມາເລເລຍໂດຍໃຊ້ ເຈ້ຍຈຸ່ມບົ່ງມະຕິແບບວ່ອງໄວບໍ່ພົບເຊື້ອ (ໃຫ້ຜົນລົບ)?</p> <p><b>ບໍ່ຕ້ອງອ່ານບັນຊີລາຍຊື່ ເຈາະຈົມ “ມີຫຍັງອີກບໍ່” ຈົນກວ່າຜູ້ຖືກສຳພາດຈະຕອບວ່າບໍ່ມີຂີດວົງອ້ອມທຸກຄຳຕອບທີ່ຜູ້ຕອບກ່າວເຖິງ</b></p> <table border="0" style="width: 100%;"> <tr> <td style="text-align: right;">ເວລາທີ່ເຂົາເຈົ້າມີອາການ/ໝວດອາການຂອງໄຂ້ມາເລເລຍ</td> <td style="text-align: center;">A</td> </tr> <tr> <td style="text-align: right;">ເວລາທີ່ເຂົາເຈົ້າຂໍຢາປິ່ນປົວພະຍາດໄຂ້ມາເລເລຍ</td> <td style="text-align: center;">B</td> </tr> <tr> <td style="text-align: right;">ເຫັນວ່າເຂົາເຈົ້າເປັນເດັກນ້ອຍ</td> <td style="text-align: center;">C</td> </tr> <tr> <td style="text-align: right;">ເຫັນວ່າເຂົາເຈົ້າເປັນຜູ້ໃຫຍ່</td> <td style="text-align: center;">D</td> </tr> <tr> <td style="text-align: right;">ເຫັນວ່າເຂົາເຈົ້າເປັນຜູ້ຍິງຖືພາ</td> <td style="text-align: center;">E</td> </tr> <tr> <td style="text-align: right;">ເມື່ອຂ້າພະເຈົ້າບໍ່ເຊື່ອຜົນກວດ</td> <td style="text-align: center;">F</td> </tr> <tr> <td style="text-align: right;">ເມື່ອຂ້າພະເຈົ້າຮູ້ຈັກຄົນເຈັບ/ລູກຄ້າ</td> <td style="text-align: center;">G</td> </tr> <tr> <td style="text-align: right;">ອື່ນໆ ລະບຸ [ ]</td> <td style="text-align: center;">X</td> </tr> </table> | ເວລາທີ່ເຂົາເຈົ້າມີອາການ/ໝວດອາການຂອງໄຂ້ມາເລເລຍ | A | ເວລາທີ່ເຂົາເຈົ້າຂໍຢາປິ່ນປົວພະຍາດໄຂ້ມາເລເລຍ | B | ເຫັນວ່າເຂົາເຈົ້າເປັນເດັກນ້ອຍ | C | ເຫັນວ່າເຂົາເຈົ້າເປັນຜູ້ໃຫຍ່ | D | ເຫັນວ່າເຂົາເຈົ້າເປັນຜູ້ຍິງຖືພາ | E | ເມື່ອຂ້າພະເຈົ້າບໍ່ເຊື່ອຜົນກວດ | F | ເມື່ອຂ້າພະເຈົ້າຮູ້ຈັກຄົນເຈັບ/ລູກຄ້າ | G | ອື່ນໆ ລະບຸ [ ] | X |  |
| ເວລາທີ່ເຂົາເຈົ້າມີອາການ/ໝວດອາການຂອງໄຂ້ມາເລເລຍ                                                                                                                                                                                                                                                                                                                                                                                                                                                                                                                                                                                                                                                                                                                                                                                                                                                                                                                                                                                                                                                                                                                                                                                                                                                                                       | A                                             |   |                                            |   |                              |   |                             |   |                                |   |                               |   |                                     |   |                |   |  |
| ເວລາທີ່ເຂົາເຈົ້າຂໍຢາປິ່ນປົວພະຍາດໄຂ້ມາເລເລຍ                                                                                                                                                                                                                                                                                                                                                                                                                                                                                                                                                                                                                                                                                                                                                                                                                                                                                                                                                                                                                                                                                                                                                                                                                                                                                          | B                                             |   |                                            |   |                              |   |                             |   |                                |   |                               |   |                                     |   |                |   |  |
| ເຫັນວ່າເຂົາເຈົ້າເປັນເດັກນ້ອຍ                                                                                                                                                                                                                                                                                                                                                                                                                                                                                                                                                                                                                                                                                                                                                                                                                                                                                                                                                                                                                                                                                                                                                                                                                                                                                                        | C                                             |   |                                            |   |                              |   |                             |   |                                |   |                               |   |                                     |   |                |   |  |
| ເຫັນວ່າເຂົາເຈົ້າເປັນຜູ້ໃຫຍ່                                                                                                                                                                                                                                                                                                                                                                                                                                                                                                                                                                                                                                                                                                                                                                                                                                                                                                                                                                                                                                                                                                                                                                                                                                                                                                         | D                                             |   |                                            |   |                              |   |                             |   |                                |   |                               |   |                                     |   |                |   |  |
| ເຫັນວ່າເຂົາເຈົ້າເປັນຜູ້ຍິງຖືພາ                                                                                                                                                                                                                                                                                                                                                                                                                                                                                                                                                                                                                                                                                                                                                                                                                                                                                                                                                                                                                                                                                                                                                                                                                                                                                                      | E                                             |   |                                            |   |                              |   |                             |   |                                |   |                               |   |                                     |   |                |   |  |
| ເມື່ອຂ້າພະເຈົ້າບໍ່ເຊື່ອຜົນກວດ                                                                                                                                                                                                                                                                                                                                                                                                                                                                                                                                                                                                                                                                                                                                                                                                                                                                                                                                                                                                                                                                                                                                                                                                                                                                                                       | F                                             |   |                                            |   |                              |   |                             |   |                                |   |                               |   |                                     |   |                |   |  |
| ເມື່ອຂ້າພະເຈົ້າຮູ້ຈັກຄົນເຈັບ/ລູກຄ້າ                                                                                                                                                                                                                                                                                                                                                                                                                                                                                                                                                                                                                                                                                                                                                                                                                                                                                                                                                                                                                                                                                                                                                                                                                                                                                                 | G                                             |   |                                            |   |                              |   |                             |   |                                |   |                               |   |                                     |   |                |   |  |
| ອື່ນໆ ລະບຸ [ ]                                                                                                                                                                                                                                                                                                                                                                                                                                                                                                                                                                                                                                                                                                                                                                                                                                                                                                                                                                                                                                                                                                                                                                                                                                                                                                                      | X                                             |   |                                            |   |                              |   |                             |   |                                |   |                               |   |                                     |   |                |   |  |

ຕື່ມເຈ້ຍບັນທຶກຕິດຕາມການກວດສອບໃນໜ້າຕໍ່ໄປແລ້ວປະຕິບັດຕາມຄຳແນະນຳສຳລັບການຈົບການສຳພາດ



| <b>ພາກທີ 6: ເຈ້ຍບັນທຶກການຕິດຕາມການກວດສອບ</b>                                                                                                            |                                   |
|---------------------------------------------------------------------------------------------------------------------------------------------------------|-----------------------------------|
| T1. ໃນຮ້ານຈຳໜ່າຍແຫ່ງນີ້ມີຢາປິ່ນປົວໄຂ້ມາເລເລຍ ທີ່ເປັນຮູບແບບຢາເມັດ/ຢາຍັດ/ຢາຝຸ່ນເປັນຊອງ (TSG) ຢູ່ໃນຮ້ານບໍ່?<br>1 = ມີ<br>0 = ບໍ່ມີ<br>8 = ບໍ່ຮູ້           | [ ]<br><br>ໄປຂໍ້ T4<br>ໄປຂໍ້ T4   |
| T2. ຈຳນວນເຈ້ຍກວດສອບທັງໝົດຂອງຢາເມັດ/ຢາຍັດ/ຢາຝຸ່ນເປັນຊອງ (TSG) ທີ່ໄດ້ຕື່ມຄົບໝົດ                                                                           | [ ] [ ]                           |
| T3. ທ່ານໄດ້ຕື່ມຂໍ້ມູນໃນຟອມກວດສອບສຳລັບຢາເມັດ/ຢາຍັດ/ຢາຝຸ່ນເປັນຊອງ (TSG) ທີ່ມີຢູ່ທັງໝົດບໍ່?<br>1 = ແມ່ນ, ການກວດສອບໄດ້ສຳເລັດ<br>0 = ບໍ່, ການກວດສອບບໍ່ສຳເລັດ | [ ]                               |
| T4. ໃນຮ້ານຈຳໜ່າຍນີ້ມີຢາປິ່ນປົວໄຂ້ມາເລເລຍ ທີ່ບໍ່ແມ່ນຢາເມັດ (ຢານ້ຳເຊືອມ, ຢານ້ຳແຂວນຕະກອນ, ຢາສັກ) (NT) ບໍ່?<br>1 = ມີ<br>0 = ບໍ່ມີ<br>8 = ບໍ່ຮູ້            | [ ]<br><br>ໄປຂໍ້ T7<br>ໄປຂໍ້ T7   |
| T5. ຈຳນວນເຈ້ຍກວດສອບຂອງຢາປິ່ນປົວໄຂ້ມາເລເລຍທີ່ບໍ່ແມ່ນຢາເມັດ (NT) ໄດ້ຖືກຕື່ມຄົບໝົດ                                                                         | [ ] [ ]                           |
| T6. ທ່ານໄດ້ຕື່ມຂໍ້ມູນໃນຟອມກວດສອບສຳລັບຢາທີ່ບໍ່ແມ່ນຢາເມັດ (NT) ຄົບໝົດບໍ່?<br>1 = ແມ່ນ, ການກວດສອບໄດ້ສຳເລັດ<br>0 = ບໍ່, ການກວດສອບບໍ່ສຳເລັດ                  | [ ]                               |
| T7. ໃນຮ້ານຈຳໜ່າຍນີ້ມີເຈ້ຍຈຸ່ມບົ່ງມະຕິແບບວ່ອງໄວ (RDT) ຢູ່ໃນຮ້ານບໍ່?<br>1 = ມີ<br>0 = ບໍ່ມີ<br>8 = ບໍ່ຮູ້                                                 | [ ]<br><br>ໄປຂໍ້ T10<br>ໄປຂໍ້ T10 |
| T8. ຈຳນວນຟອມກວດສອບຂອງເຈ້ຍຈຸ່ມບົ່ງມະຕິແບບວ່ອງໄວ (RDT) ໄດ້ຖືກຕື່ມຂໍ້ມູນຄົບໝົດ                                                                             | [ ] [ ]                           |
| T9. ຈຳນວນຟອມກວດສອບຂອງເຈ້ຍຈຸ່ມບົ່ງມະຕິແບບວ່ອງໄວ (RDT) ໄດ້ຖືກຕື່ມຂໍ້ມູນຄົບໝົດ<br>1 = ແມ່ນ, ການກວດສອບໄດ້ສຳເລັດ<br>0 = ບໍ່, ການກວດສອບບໍ່ສຳເລັດ              | [ ]                               |
| T10. ໃນຮ້ານຈຳໜ່າຍນີ້, ເຄີຍມີຜະລິດຕະພັນໃດທີ່ບໍ່ມີຢູ່ໃນຮ້ານ (ຂາດສາງ) ບໍ່, ແຕ່ທ່ານເຄີຍມີ ໃນ 3 ເດືອນ ຜ່ານທີ່ມາ?<br>1 = ມີ<br>0 = ບໍ່ມີ<br>8 = ບໍ່ຮູ້        | [ ]<br><br>ໄປຂໍ້ T12<br>ໄປຂໍ້ T12 |
| T11. ລວມຈຳນວນຜະລິດຕະພັນ ທີ່ບໍ່ມີຢູ່ໃນຮ້ານ (ຂາດສາງ) ທີ່ບັນທຶກຢູ່ໃນຄຳຖາມຂໍ້ A17a                                                                          | [ ] [ ]                           |
| T12. ຄວາມເຫັນຕ່າງໆ: ເຫດຜົນທີ່ບໍ່ສາມາດສຳເລັດເຈ້ຍກວດສອບ (ຖ້າຄຳຕອບ ໃນຂໍ້ T3, T6, ຫຼື T9 ຕອບ “ບໍ່”)                                                         |                                   |

**ດຳເນີນການຕື່ມຂໍ້ C9 ແລະ ບັນທຶກຜົນຂອງການສຳພາດ ແລະ ເວລາທີ່ສຳເລັດການສຳພາດ, ຈາກນັ້ນໄປ ພາກ X: ເສັດສິ້ນການສຳພາດ.**
